# Supplementary material
Source: bioRxiv or medRxiv preprint supplement (https://medrxiv.org/highwire/filestream/98295/field_highwire_adjunct_files/0/2020.09.25.20200774-1.pdf)
Supplement: Supplementary file [file 2020.09.25.20200774-1.pdf]

## SUPPLEMENTARY MATERIAL

### **Admission blood glucose is an independent risk factor of poor prognosis in COVID-19 patients: A systematic review and dose-response meta-analysis**

Gilbert Lazarus<sup>1</sup>, Jessica Audrey<sup>1</sup>, Vincent Kharisma Wangsaputra<sup>1</sup>, Alice Tamara<sup>1</sup>, Dicky Levenus Tahapary<sup>2,3</sup>

<sup>1</sup>Faculty of Medicine, Universitas Indonesia, Jakarta, Indonesia

<sup>2</sup>Division of Endocrinology and Metabolism, Department of Internal Medicine, Dr. Cipto Mangunkusumo General Hospital, Faculty of Medicine Universitas Indonesia, Central Jakarta, Jakarta, Indonesia

<sup>3</sup>Metabolic, Cardiovascular and Aging Cluster, The Indonesian Medical Education and Research Institute, Faculty of Medicine Universitas Indonesia, Central Jakarta, Jakarta, Indonesia

#### **Table and Contents**

| <b>Supplementary Material</b>                                                                                                                           | <b>Page</b>               |
|---------------------------------------------------------------------------------------------------------------------------------------------------------|---------------------------|
| <b>Methods</b>                                                                                                                                          | <u><a href="#">3</a></u>  |
| Search strategy                                                                                                                                         | <u><a href="#">3</a></u>  |
| Table S1. Search strategies                                                                                                                             | <u><a href="#">3</a></u>  |
| Study eligibility criteria                                                                                                                              | <u><a href="#">6</a></u>  |
| Table S2. PICOTS framework                                                                                                                              | <u><a href="#">6</a></u>  |
| Data extraction and risk of bias assessment                                                                                                             | <u><a href="#">7</a></u>  |
| Table S3. QUIPS tool signaling question                                                                                                                 | <u><a href="#">8</a></u>  |
| Statistical analysis                                                                                                                                    | <u><a href="#">11</a></u> |
| <b>Results</b>                                                                                                                                          | <u><a href="#">14</a></u> |
| Table S4. Characteristics of included studies                                                                                                           | <u><a href="#">14</a></u> |
| Figure S1. Risk of bias summary for included studies as assessed with the Quality in Prognostic Studies tool                                            | <u><a href="#">17</a></u> |
| Table S5. Pooled unadjusted estimates of high vs low meta-analysis on the association between admission blood glucose and outcomes of COVID-19 patients | <u><a href="#">18</a></u> |
| Table S6. Summary of certainty of evidence as assessed with the GRADE approach                                                                          | <u><a href="#">19</a></u> |

|                                                                                                                                                                                                                                                               |           |
|---------------------------------------------------------------------------------------------------------------------------------------------------------------------------------------------------------------------------------------------------------------|-----------|
| Table S7. Locations of included studies originating from China                                                                                                                                                                                                | <u>23</u> |
| Figure S2. Leave-one-out sensitivity analysis of high vs low meta-analysis between admission fasting blood glucose and outcomes on (A) poor outcome, (B) mortality and (C) severity                                                                           | <u>25</u> |
| Figure S3. Contour-enhanced funnel plot with pseudo 95% confidence interval indicating evidence of publication bias (as shown by asymmetry) for high vs low meta-analysis evaluating admission fasting blood glucose level and mortality in COVID-19 patients | <u>26</u> |
| Figure S4. Linear dose-response relationship between admission FBG level and mortality in non-diabetic COVID-19 patients                                                                                                                                      | <u>26</u> |
| Table S8. Outcomes on the association of admission fasting blood glucose and prognosis of COVID-19 patients                                                                                                                                                   | <u>27</u> |
| Table S9. Sensitivity analysis for linear dose-response meta-analysis on the association between admission fasting blood glucose concentration and mortality and severity in COVID-19 patients                                                                | <u>33</u> |
| Figure S5. Sensitivity analysis for non-linear dose-response meta-analysis of severity outcome according to location of knots                                                                                                                                 | <u>34</u> |
| Table S10. Outcomes on the association of admission random blood glucose and prognosis of COVID-19 patients                                                                                                                                                   | <u>35</u> |
| <b>Supplementary References</b>                                                                                                                                                                                                                               | <u>38</u> |

## SUPPLEMENTARY METHODS

### Search strategy

We initially searched PubMed, EMBASE (via Ovid), Cochrane Controlled Register of Trials (CENTRAL), MEDLINE (via EBSCO), Cumulative Index to Nursing and Allied Health Literature (CINAHL), and Scopus databases for studies published up to 8 September 2020 using keywords listed on Table S1. Then, we additionally searched grey literature (viz, Google Scholar and ProQuest), preprint (via, MedRxiv and BioRxiv), and the World Health Organization (WHO) COVID-19 research databases, in addition to manually hand-searching reference lists from included studies and similar reviews. Lastly, we collected the PubMed ID of each included studies and ran additional search using the PubMed’s ‘similar articles’ algorithm. Subsequently, the retrieved results were deduplicated and screened against the pre-specified eligibility criteria.

**Table S1.** Search strategies

| Database                              | Keywords                                                                                                                                                                                                                                                                                                                                                                                                                                                                                                                                                                                                                                                                                                                                                                                                                                                                                                                                                                                                                                                                                                                                                                                                                                                                                                                                                                                                                            |
|---------------------------------------|-------------------------------------------------------------------------------------------------------------------------------------------------------------------------------------------------------------------------------------------------------------------------------------------------------------------------------------------------------------------------------------------------------------------------------------------------------------------------------------------------------------------------------------------------------------------------------------------------------------------------------------------------------------------------------------------------------------------------------------------------------------------------------------------------------------------------------------------------------------------------------------------------------------------------------------------------------------------------------------------------------------------------------------------------------------------------------------------------------------------------------------------------------------------------------------------------------------------------------------------------------------------------------------------------------------------------------------------------------------------------------------------------------------------------------------|
| PubMed                                | (((("blood glucose"[MeSH Terms]) AND (("fasting"[MeSH Terms]) OR ("postprandial period"[MeSH Terms]))) OR ("glucose tolerance test"[MeSH Terms]) OR "fasting blood glucose" OR "fasting plasma glucose" OR "fasting blood sugar" OR "fasting plasma sugar" OR "admission blood glucose" OR "admission plasma glucose" OR "admission blood sugar" OR "admission plasma sugar" OR "initial plasma glucose" OR "initial blood glucose" OR "initial blood sugar" OR "initial plasma sugar" OR "post-load blood glucose" OR "post-load plasma glucose" OR "post-load blood sugar" OR "post-load plasma sugar" OR "postprandial blood glucose" OR "postprandial plasma glucose" OR "postprandial blood sugar" OR "postprandial plasma glucose" OR "postprandial glucose" OR "postprandial glucose excursions" OR "oral glucose tolerance" OR "2 hours plasma glucose" OR "2 hours blood glucose" OR "2 hours blood sugar" OR "2 hours plasma sugar") AND ("novel coronavirus" OR ("Coronavirus"[MeSH Terms]) OR ("Coronavirus Infections"[MeSH Terms]) OR "coron?virus*" OR "coron?virinae*" OR "coronavirus" OR "2019-nCoV" OR "nCoV-2019" OR "COVID-19" OR "HCoV-19" OR "N-cov" OR "SARS-CoV-2" OR "SARS-Cov-19" OR "2019-new coronavirus" OR "2019-ncov" OR "2019?novel coronavirus" OR "Ncorona*" OR "COVID19" OR "HCoV19" OR "Ncov" OR "SARSCoV2" OR "SARSCoV19" OR "2019novel-coronavirus" OR "2019ncov" OR "2019new-coronavirus")) |
| PubMed’s ‘similar articles’-algorithm | 16759303[PMID] OR 32406594[PMID] OR 32503812[PMID] OR 32602202[PMID] OR 32446795[PMID] OR 32638507[PMID] OR 32647915[PMID] OR 32712122[PMID] OR 32409504[PMID] OR 32167524[PMID] OR 32754119[PMID] OR 32469464[PMID] OR                                                                                                                                                                                                                                                                                                                                                                                                                                                                                                                                                                                                                                                                                                                                                                                                                                                                                                                                                                                                                                                                                                                                                                                                             |

|                |                                                                                                                                                                                                                                                                                                                                                                                                                                                                                                                                                                                                                                                                                                                                                                                                                                                                                                                                                                                                                                                                                                                                                                                                                                                                                                                                                                                                                                                                                                                                                                                                                                                                                                                                                |
|----------------|------------------------------------------------------------------------------------------------------------------------------------------------------------------------------------------------------------------------------------------------------------------------------------------------------------------------------------------------------------------------------------------------------------------------------------------------------------------------------------------------------------------------------------------------------------------------------------------------------------------------------------------------------------------------------------------------------------------------------------------------------------------------------------------------------------------------------------------------------------------------------------------------------------------------------------------------------------------------------------------------------------------------------------------------------------------------------------------------------------------------------------------------------------------------------------------------------------------------------------------------------------------------------------------------------------------------------------------------------------------------------------------------------------------------------------------------------------------------------------------------------------------------------------------------------------------------------------------------------------------------------------------------------------------------------------------------------------------------------------------------|
|                | 32472191[PMID] OR 32430456[PMID] OR 32788285[PMID] OR 32842719[PMID] OR 32853687[PMID] OR 32357072[PMID] OR 32636061[PMID] OR 32805345[PMID] OR 32389027[PMID] OR 32360710[PMID] OR 32384078[PMID] OR 32623030[PMID] OR 32758659[PMID]                                                                                                                                                                                                                                                                                                                                                                                                                                                                                                                                                                                                                                                                                                                                                                                                                                                                                                                                                                                                                                                                                                                                                                                                                                                                                                                                                                                                                                                                                                         |
| Ovid<br>EMBASE | ((blood glucose.mp. or glucose blood level/) and (fasting.mp. or fasting/ or postprandial state/ or postprandial.mp.)) or (fasting blood glucose or fasting plasma sugar or admission blood glucose or admission plasma glucose or admission blood sugar or admission plasma sugar or initial plasma glucose or initial blood glucose or initial blood sugar or initial plasma sugar or post-load blood glucose or postprandial blood sugar or postprandial plasma glucose or postprandial glucose or postprandial glucose excursions or oral glucose tolerance or 2 hours plasma glucose or 2 hours blood glucose or 2 hours blood sugar or 2 hours plasma sugar).mp.)) and ((coronavirus infection.mp. or Coronavirus infection/ or SARS coronavirus/ or Coronavirus/) or (coron?virus* or coron?virinae* or coronavirus or 2019-ncov or ncov-2019 or covid-19 or hcov-19 or n-cov or sars-cov-2 or sars-cov-19 or 2019-new coronavirus or 2019-ncov or 2019?novelcoronavirus or ncorona* or covid19 or hcov19 or ncov or sarscov2 or sarscov19 or 2019novel-coronavirus or 2019ncov or 2019new-coronavirus or sars coronavirus or coronavirus).mp.))                                                                                                                                                                                                                                                                                                                                                                                                                                                                                                                                                                                        |
| CENTRAL        | <p>#1 MeSH descriptor: [Coronavirus] explode all trees</p> <p>#2 MeSH descriptor: [Coronavirus Infections] explode all trees</p> <p>#3 MeSH descriptor: [Blood Glucose] explode all trees</p> <p>#4 MeSH descriptor: [Fasting] explode all trees</p> <p>#5 MeSH descriptor: [Patient Admission] explode all trees</p> <p>#6 MeSH descriptor: [Postprandial Period] explode all trees</p> <p>#7 MeSH descriptor: [Glucose Tolerance Test] explode all trees</p> <p>#8 (#3 OR #7) AND #5 AND {OR #4-#6}</p> <p>#9 {OR #1-#2} OR "coron?virus*" OR "coron?virinae*" OR "coronavirus" OR "2019-nCoV" OR "nCoV-2019" OR "COVID-19" OR "HCoV-19" OR "N-cov" OR "SARS-CoV-2" OR "SARS-Cov-19" OR "2019-new coronavirus" OR "2019-ncov" OR "2019?novel coronavirus" OR "Ncorona*" OR "COVID19" OR "HCoV19" OR "Ncov" OR "SARSCoV2" OR "SARSCoV19" OR "2019novel-coronavirus" OR "2019ncov" OR "2019new-coronavirus"</p> <p>#10 #8 OR "fasting blood glucose" OR "fasting plasma glucose" OR "fasting blood sugar" OR "fasting plasma sugar" OR "admission blood glucose" OR "admission plasma glucose" OR "admission blood sugar" OR "admission plasma sugar" OR "initial plasma glucose" OR "initial blood glucose" OR "initial blood sugar" OR "initial plasma sugar" OR "post-load blood glucose" OR "post-load plasma glucose" OR "post-load blood sugar" OR "post-load plasma sugar" OR "postprandial blood glucose" OR "postprandial plasma glucose" OR "postprandial blood sugar" OR "postprandial plasma sugar" OR "postprandial glucose" OR "postprandial glucose excursions" OR "oral glucose tolerance" OR "2 hours plasma glucose" OR "2 hours blood glucose" OR "2 hours blood sugar" OR "2 hours plasma sugar"</p> <p>#11 #9 AND #10</p> |

|                             |                                                                                                                                                                                                                                                                                                                                                                                                                                                                                                                                                                                                                                                                                                                                                                                                                                                                                                                                                                                                                                                                                                                                                                                                                                                                                                                                                               |
|-----------------------------|---------------------------------------------------------------------------------------------------------------------------------------------------------------------------------------------------------------------------------------------------------------------------------------------------------------------------------------------------------------------------------------------------------------------------------------------------------------------------------------------------------------------------------------------------------------------------------------------------------------------------------------------------------------------------------------------------------------------------------------------------------------------------------------------------------------------------------------------------------------------------------------------------------------------------------------------------------------------------------------------------------------------------------------------------------------------------------------------------------------------------------------------------------------------------------------------------------------------------------------------------------------------------------------------------------------------------------------------------------------|
| ProQuest                    | ((MESH("patient admission" AND ("fasting" OR "postprandial period") AND ("blood glucose" OR "glucose tolerance test")) OR "fasting blood glucose" OR "fasting plasma glucose" OR "fasting blood sugar" OR "fasting plasma sugar" OR "admission blood glucose" OR "admission plasma glucose" OR "admission blood sugar" OR "admission plasma sugar" OR "initial plasma glucose" OR "initial blood glucose" OR "initial blood sugar" OR "initial plasma sugar" OR "post-load blood glucose" OR "post-load plasma glucose" OR "post-load blood sugar" OR "post-load plasma sugar" OR "postprandial blood glucose" OR "postprandial plasma glucose" OR "postprandial blood sugar" OR "postprandial plasma sugar" OR "postprandial glucose" OR "postprandial glucose excursions" OR "oral glucose tolerance" OR "2 hours plasma glucose" OR "2 hours blood glucose" OR "2 hours blood sugar" OR "2 hours plasma sugar") AND (MESH("Coronavirus" OR "Coronavirus infections") OR "coron?virus*" OR "coron?virinae*" OR "corona-virus" OR "2019-nCoV" OR "nCoV-2019" OR "COVID-19" OR "HCoV-19" OR "N-cov" OR "SARS-CoV-2" OR "SARS-Cov-19" OR "2019-new coronavirus" OR "2019-ncov" OR "2019?novel coronavirus" OR "Ncorona*" OR "COVID19" OR "HCoV19" OR "Ncov" OR "SARSCoV2" OR "SARSCoV19" OR "2019novel-coronavirus" OR "2019ncov" OR "2019new-coronavirus")))) |
| Google Scholar              | ((("initial" OR "admission") AND ("fasting" OR "postprandial")) OR ("blood glucose" OR "blood sugar" OR "plasma glucose" OR "plasma sugar")) AND ("COVID-19" OR "SARS-CoV-2" OR "2019-ncov" OR "novel coronavirus"))                                                                                                                                                                                                                                                                                                                                                                                                                                                                                                                                                                                                                                                                                                                                                                                                                                                                                                                                                                                                                                                                                                                                          |
| CINAHL, MEDLINE (via EBSCO) | S1 (MH "Blood Glucose")<br>S2 (MH "Patient Admission") OR (MH "Fasting")<br>S3 S1 AND S2<br>S4 S3 OR ("fasting blood glucose" OR "fasting plasma glucose" OR "fasting blood sugar" OR "fasting plasma sugar" OR "admission blood glucose" OR "admission plasma glucose" OR "admission blood sugar" OR "admission plasma sugar" OR "initial plasma glucose" OR "initial blood glucose" OR "initial blood sugar" OR "initial plasma sugar" OR "post-load blood glucose" OR "post-load plasma glucose" OR "post-load blood sugar" OR "post-load plasma sugar" OR "postprandial blood glucose" OR "postprandial plasma glucose" OR "postprandial blood sugar" OR "postprandial plasma sugar" OR "postprandial glucose" OR "postprandial glucose excursions" OR "oral glucose tolerance" OR "2 hours plasma glucose" OR "2 hours blood glucose" OR "2 hours blood sugar" OR "2 hours plasma sugar")<br>S5 ((MH "Coronavirus Infections+") OR (MH "COVID-19") OR "coron?virus*" OR "coron?virinae*" OR "corona-virus" OR "2019-nCoV" OR "nCoV-2019" OR "COVID-19" OR "HCoV-19" OR "N-cov" OR "SARS-CoV-2" OR "SARS-Cov-19" OR "2019-new-coronavirus" OR "2019-ncov" OR "2019-novel-coronavirus" OR "Ncorona*" OR "COVID19" OR "HCoV19" OR "Ncov" OR "SARSCoV2" OR "SARSCoV19" OR "2019novel-coronavirus" OR "2019ncov" OR "2019new-coronavirus"))<br>S6 S4 AND S5   |
| Scopus                      | ((TITLE-ABS-KEY("fasting blood glucose" OR "fasting plasma glucose" OR "fasting blood sugar" OR "fasting plasma sugar" OR "admission blood                                                                                                                                                                                                                                                                                                                                                                                                                                                                                                                                                                                                                                                                                                                                                                                                                                                                                                                                                                                                                                                                                                                                                                                                                    |

|                                |                                                                                                                                                                                                                                                                                                                                                                                                                                                                                                                                                                                                                                                                                                                                                                                                                                                                                                                                                                                                                                                                        |
|--------------------------------|------------------------------------------------------------------------------------------------------------------------------------------------------------------------------------------------------------------------------------------------------------------------------------------------------------------------------------------------------------------------------------------------------------------------------------------------------------------------------------------------------------------------------------------------------------------------------------------------------------------------------------------------------------------------------------------------------------------------------------------------------------------------------------------------------------------------------------------------------------------------------------------------------------------------------------------------------------------------------------------------------------------------------------------------------------------------|
|                                | glucose" OR "admission plasma glucose" OR "admission blood sugar" OR "admission plasma sugar" OR "initial plasma glucose" OR "initial blood glucose" OR "initial blood sugar" OR "initial plasma sugar" OR "post-load blood glucose" OR "post-load plasma glucose" OR "post-load blood sugar" OR "post-load plasma sugar" OR "postprandial blood glucose" OR "postprandial plasma glucose" OR "postprandial blood sugar" OR "postprandial plasma glucose" OR "postprandial glucose" OR "postprandial glucose excursions" OR "oral glucose tolerance" OR "2 hours plasma glucose" OR "2 hours blood glucose" OR "2 hours blood sugar" OR "2 hours plasma sugar")) AND (TITLE-ABS-KEY("coron?virus*" OR "coron?virinae*" OR "corona-virus" OR "2019-nCoV" OR "nCoV-2019" OR "COVID-19" OR "HCoV-19" OR "N-cov" OR "SARS-CoV-2" OR "SARS-Cov-19" OR "2019-new-coronavirus" OR "2019-ncov" OR "2019-novel-coronavirus" OR "Ncorona*" OR "COVID19" OR "HCoV19" OR "Ncov" OR "SARSCoV2" OR "SARSCoV19" OR "2019novel-coronavirus" OR "2019ncov" OR "2019new-coronavirus")))) |
| MedRxiv, BioRxiv               | ((("postprandial" OR "fasting" OR "random") AND "glucose")) AND ("COVID-19" OR "SARS-CoV-2"))                                                                                                                                                                                                                                                                                                                                                                                                                                                                                                                                                                                                                                                                                                                                                                                                                                                                                                                                                                          |
| WHO COVID-19 Research Database | ((tw:(("fasting" OR "postprandial" OR "random") AND ("glucose" OR "sugar"))))                                                                                                                                                                                                                                                                                                                                                                                                                                                                                                                                                                                                                                                                                                                                                                                                                                                                                                                                                                                          |

**CENTRAL**, Cochrane Controlled Register of Trials; **CINAHL**, Cumulative Index to Nursing and Allied Health Literature. **WHO**, World Health Organization.

### Study eligibility criteria

In accordance to the objectives of our meta-analysis, we developed a ‘Population, Index prognostic factor, Comparator prognostic factor, Outcome, Timing, Settings’ (PICOTS) framework adapted from the guideline proposed by Riley et al<sup>1</sup>.

**Table S2.** PICOTS framework

| Item                         | Definition                                                                                                                                                                   |
|------------------------------|------------------------------------------------------------------------------------------------------------------------------------------------------------------------------|
| Population                   | Patients with COVID-19 infection                                                                                                                                             |
| Index prognostic factor      | Blood glucose concentration (i.e. FBG and RBG)                                                                                                                               |
| Comparator prognostic factor | None                                                                                                                                                                         |
| Outcome                      | Death or progression to severe COVID-19 cases—further investigated per criterion: ARDS, shock, patients requiring ICU admission, and patients requiring invasive ventilation |
| Timing                       | Prognostic factor: at admission                                                                                                                                              |

|         |                                                                                                                                                 |
|---------|-------------------------------------------------------------------------------------------------------------------------------------------------|
|         | Outcome: at any point                                                                                                                           |
| Setting | To provide prognostic information about COVID-19 patients; this information may help clinicians in stratifying the risk among COVID-19 patients |

**ARDS**, acute respiratory distress syndrome; **COVID-19**, coronavirus disease 2019; **FBG**, fasting blood glucose; **PICOTS**, population, index prognostic factor, comparator, outcome, timing, and setting; **RBG**, random blood glucose.

### Data extraction and risk of bias assessment

The following essential data were extracted: (1) author and year of publication; (2) study characteristics, viz. recruitment period, study design, location, and sample size; (3) patient characteristics, viz. age in years, proportion of male populations, comorbidities, blood glucose (BG) marker, and admission BG level; and (4) outcomes and its effect sizes. In the case of unidentifiable blood glucose marker, corresponding authors were contacted to obtain the missing data, and the articles were subsequently excluded when no response was provided by the authors.

During extraction, admission BG level of any cut-off value and any effect size (both adjusted and unadjusted) were incorporated. In the case where studies only reporting time-to-event outcomes using the Kaplan-Meier curve, data were digitized with GetData Graph Digitizer ver. 2.26 ([www.getdata-graph-digitizer.com](http://www.getdata-graph-digitizer.com)) and hazard ratios (HRs) were estimated using the formula proposed by Tierney et al<sup>2</sup>. Similarly, the unadjusted relative risk (RR) was also calculated from binary data using the provided formula<sup>3</sup>, whenever available. The included studies were further investigated for risk of bias using a tailored version of the Quality in Prognosis Studies (QUIPS) tool<sup>4</sup>, which assessed the study-specific risk of bias across to six bias domains: study participation, study attrition, prognostic factor measurement, outcome measurement, and study confounding, and statistical analysis and reporting. Details on each signaling question of the QUIPS tool are elaborated on Table S3.

**Table S3.** QUIPS tool signaling question

| <b>Signaling question</b>                                        | <b>Issues to consider for author's judgment of 'yes'</b>        |
|------------------------------------------------------------------|-----------------------------------------------------------------|
| <b>1. Study participation: yes/no/unclear/NA<sup>a</sup></b>     |                                                                 |
| a. Description of source of population or population of interest | Source population for cohort with COVID-19 is clearly described |

|                                                                                                |                                                                                                                                                                                                                                                                           |
|------------------------------------------------------------------------------------------------|---------------------------------------------------------------------------------------------------------------------------------------------------------------------------------------------------------------------------------------------------------------------------|
| b. Adequate description of sampling frame and recruitment                                      | Methods of sampling and limiting potential bias arising from participant selection are described (i.e. no selective sampling)                                                                                                                                             |
| c. Adequate description of recruitment period                                                  | Period of recruitment is clearly described                                                                                                                                                                                                                                |
| d. Adequate description of place of recruitment                                                | Place of recruitment is clearly described                                                                                                                                                                                                                                 |
| e. Adequate description of inclusion and exclusion criteria                                    | Definition of patients with COVID-19 and other inclusion and exclusion criteria are described                                                                                                                                                                             |
| f. Adequate participation in the study by eligible individuals                                 | Proportion of COVID-19 patients participating in the study is adequate                                                                                                                                                                                                    |
| g. Description of baseline study sample                                                        | Baseline characteristics of COVID-19 patients are clearly described                                                                                                                                                                                                       |
| <b>Study participation: risk of bias</b>                                                       | <p><b>High:</b> Most items are answered with ‘no’; <b>Low:</b> Most items are answered with ‘yes’; <b>Unclear:</b> Most items are answered with ‘unclear’</p> <p>Note: A single ‘no’ answer may potentially result in high risk of bias, depending on study specifics</p> |
| <b>2. Study attrition: yes/no/unclear</b>                                                      |                                                                                                                                                                                                                                                                           |
| a. Adequate response rate for study participants                                               | Proportion of COVID-19 patients completing the study with outcome data is adequate (<10% missing)                                                                                                                                                                         |
| b. Description of attempts to collect information on participants who dropped out              | Attempts to collect information on participants who dropped out are clearly described                                                                                                                                                                                     |
| c. Reasons for loss to follow-up provided                                                      | Reasons of participants who dropped out are provided (e.g. transferred to another hospital)                                                                                                                                                                               |
| d. Adequate description of participants lost to follow up                                      | Key characteristics of participants who dropped out are described (e.g. age, sex, admission blood glucose)                                                                                                                                                                |
| e. No important differences between participants who completed the study and those who did not | Differences between participants completing the study and those who did not are described as not important, or information to judge the differences, if any, are provided                                                                                                 |
| <b>Study attrition: risk of bias</b>                                                           | <p><b>High:</b> Most items are answered with ‘no’; <b>Low:</b> Most items are answered with ‘yes’; <b>Unclear:</b> Most items are answered with ‘unclear’</p> <p>Note: A single ‘no’ answer may potentially result in high risk of bias, depending on study specifics</p> |
| <b>3. Blood glucose measurement: yes/no/unclear/NA<sup>a</sup></b>                             |                                                                                                                                                                                                                                                                           |
| a. A clear definition or description of blood glucose measured is provided                     | Measurement for admission blood glucose are provided (e.g. FBG, RBG)                                                                                                                                                                                                      |



|                                                                                              |                                                                                                                                                                                                                                                                    |
|----------------------------------------------------------------------------------------------|--------------------------------------------------------------------------------------------------------------------------------------------------------------------------------------------------------------------------------------------------------------------|
| b. Method of blood glucose measurement is adequately valid and reliable                      | Method of obtaining admission blood glucose measurement is valid and reliable (e.g. laboratory measurements)                                                                                                                                                       |
| c. Continuous variables reported or appropriate cut points used                              | Standard categories or cut-off points to classify admission blood glucose are used                                                                                                                                                                                 |
| d. Method and setting of measurement of blood glucose is the same for all study participants | Measurement of admission blood glucose is the same for all study participants                                                                                                                                                                                      |
| e. Adequate proportion of the study sample has complete data for blood glucose variable      | Proportion of study sample with complete admission blood glucose data available for analysis is adequate                                                                                                                                                           |
| f. Appropriate methods of imputation were used for missing data                              | <b>NA:</b> missing laboratory measurements for admission blood glucose cannot be reliably imputed                                                                                                                                                                  |
| <b>Blood glucose measurement: risk of bias</b>                                               | <b>High:</b> Most items are answered with ‘no’; <b>Low:</b> Most items are answered with ‘yes’; <b>Unclear:</b> Most items are answered with ‘unclear’<br><br>Note: A single ‘no’ answer may potentially result in high risk of bias, depending on study specifics |
| <b>4. Outcome measurement: yes/no/unclear</b>                                                |                                                                                                                                                                                                                                                                    |
| a. Clear definition of the outcome provided                                                  | Measurement of poor composite outcome, mortality, or severity criteria should be clearly defined                                                                                                                                                                   |
| b. Method of outcome measurement used is adequately valid and reliable                       | Method of outcome ascertainment is valid and reliable: based on events reported on medical records (e.g. ICU admission, death) or valid severity criteria                                                                                                          |
| c. Method and setting of outcome measurement is the same for all study participants          | Measurement of poor composite outcome, severity, or mortality should be the same for all study participants                                                                                                                                                        |
| <b>Outcome measurement: risk of bias</b>                                                     | <b>High:</b> Most items are answered with ‘no’; <b>Low:</b> Most items are answered with ‘yes’; <b>Unclear:</b> Most items are answered with ‘unclear’<br><br>Note: A single ‘no’ answer may potentially result in high risk of bias, depending on study specifics |
| <b>5. Study confounding: yes/no/unclear</b>                                                  |                                                                                                                                                                                                                                                                    |
| a. Important confounders are measured                                                        | Important confounders are age, sex, and comorbidities                                                                                                                                                                                                              |
| b. Clear definitions of the important confounders measured are provided                      | Definition and measurement of confounders are clearly described                                                                                                                                                                                                    |
| c. Measurement of confounders is                                                             | Measurement of confounders is valid and reliable                                                                                                                                                                                                                   |

|                                                                                            |                                                                                                                                                                                           |
|--------------------------------------------------------------------------------------------|-------------------------------------------------------------------------------------------------------------------------------------------------------------------------------------------|
|                                                                                            | adequately valid and reliable                                                                                                                                                             |
| d. Same method and setting of confounding measurement in all study participants            | Measurements of confounders are the same for all study participants                                                                                                                       |
| e. Appropriate methods are used if imputation is used for missing confounder data          | Methods to impute missing confounder data, if any, are appropriate and clearly described                                                                                                  |
| f. Important potential confounders are accounted for in the study design                   | Strategies to account for potential confounders are described in the methods section of the study                                                                                         |
| g. Important potential confounders are accounted for in the analysis                       | Important confounders are accounted for in multivariable logistic regression and Cox proportional hazards models                                                                          |
| <b>Study confounding: risk of bias</b>                                                     | <b>High:</b> Most items are answered with ‘no’; <b>Low:</b> Most items are answered with ‘yes’; <b>Unclear:</b> Most items are answered with ‘unclear’                                    |
|                                                                                            | Note: A single ‘no’ answer may potentially result in high risk of bias, depending on study specifics                                                                                      |
| <b>6. Statistical analysis and reporting: yes/no/unclear/NA<sup>a</sup></b>                |                                                                                                                                                                                           |
| a. Sufficient presentation of data to assess the adequacy of the analysis                  | Mean or median values of variables are appropriately reported with standard deviations or interquartile range, results are properly reported with confidence intervals or standard errors |
| b. Strategy for model building is appropriate and based on a conceptual framework or model | NA: Since the research question focuses on only one prognostic factor, model building strategies or conceptual framework are not expected                                                 |
| c. The selected statistical model is adequate for the design of the study                  | Univariate and multivariate logistic regression or Cox proportional hazard model are used as appropriate                                                                                  |
| d. No selective reporting of results                                                       | NA: admission blood glucose as the prognostic factor of interest and its relation to severity or mortality should be reported, or else study would be excluded                            |
| <b>Statistical analysis and reporting: risk of bias</b>                                    | <b>High:</b> Most items are answered with ‘no’; <b>Low:</b> Most items are answered with ‘yes’; <b>Unclear:</b> Most items are answered with ‘unclear’                                    |
|                                                                                            | Note: A single ‘no’ answer may potentially result in high risk of bias, depending on study specifics                                                                                      |
| <b>Overall risk of bias</b>                                                                | <b>Low:</b> Low risk of bias in all domains or moderate risk of bias in up to one domain; <b>High:</b> High risk of bias in one or more domains or moderate risk of bias in most domains; |

---

**Moderate:** All cases not fulfilling criteria for either low or high risk of bias

---

<sup>a</sup>NA (not applicable): The signaling question is not applicable to this type of prognostic review.

**COVID-19**, Coronavirus disease 2019; **FBG**, fasting blood glucose, **ICU**, intensive care unit; **NA**, not applicable; **RBG**, random blood glucose; **QUIPS**, Quality in Prognostic Studies tool

### Statistical analysis

Data syntheses were performed to assess the association between admission BG level (i.e. fasting BG [FBG] and random BG [RBG]) and poor outcome in COVID-19 patients. We analyzed poor outcome (i.e. composite endpoint of mortality or severity), mortality, and severity separately to prevent any model selection bias, as some studies reported mortality and severity separately. When the studies utilized two-hours postprandial glucose level as the exposure, we assumed the value of 7.8 and 11.1 mmol/L to be equivalent to FBG level of 5.6 and 7.0 mmol/L, respectively.<sup>5</sup>

All outcomes were presented in relative risks (RRs). Odds ratios (ORs) were converted to RRs as per Cochrane recommendations<sup>6</sup>; while hazard ratios (HRs) by using the formula provided by VanderWeele et al when outcome probabilities of both exposed and non-exposed groups fell between 20% and 80%<sup>7</sup>. When the outcome probabilities of either group were relatively small, HR was used interchangeably with RR due to close approximates. This approach has been proven to yield smaller bias ratios than indifferent interchangeable use of HRs and RRs.<sup>7</sup>

Meta-analysis was first conducted by pooling the highest vs lowest category of exposures (i.e. admission BG level) using the DerSimonian-Laird random-effects model. We deemed that random-effects model was the most appropriate model due to the likeliness of unexplained heterogeneity in prognostic reviews.<sup>1</sup> Heterogeneity was classified as negligible, low, moderate, or high to  $I^2$  values of 0%, 25%, 50%, and 75%, respectively<sup>8</sup>; while P value of <0.10 indicated statistical significance for Q statistics. In the case where two or more studies involved overlapping populations, analysis was prioritized to studies with larger sample sizes. Dependencies of study effects were screened according to the heuristic proposed by Wood et al, taking into account the following criteria: (1) study location, (2) recruitment period, and (3) overlapping co-authors.<sup>9</sup>

For the dose-response meta-analysis (DRMA), we first assigned the reported mean or median admission BG level of each category, or estimated the midpoint of lower and upper bounds of the respective category (when only range was reported) for each included study. The

interval length of the highest open-ended category was assumed to be 1.5 times the width of the adjacent category; while the lower limit of the open-ended lowest category was estimated to be 3.9 mmol/L.<sup>10</sup> Then, we estimated the study-specific linear trend by using the two-stage random-effects model with generalized least squares method as described by Greenland and Longnecker<sup>11</sup>. The estimated trends were subsequently pooled with two-stage random-effects meta-analysis. Non-linear dose-response meta-analysis was only conducted for studies reporting at least three categories. Details on the investigation of non-linear trends have been fully discussed in the main text.

Subgroup analyses were performed only when there were at least two studies in each subgroup (or when the subgroups are more than two, subgroup analyses were carried out if there were a minimum of two studies in at least two subsets). Subgroups were divided to explore potential sources of heterogeneity according to study design (prospective vs retrospective), sample size (<200 vs  $\geq$ 200 patients), location (China vs non-China), risk of bias (low vs moderate/high), number of category (two categories, >2 categories, and continuous), effect size type (HR vs RR), while subgroup analysis to evaluate possible disparities in clinical was carried out by comparing estimates between diabetic and non-diabetic patients. Although HR is usually expected to approximate similarly to RR when the outcomes are relatively rare<sup>7</sup>, we were unable to convert the effect size to RR when either cohorts' outcome probability lie beyond the range (i.e. <20% or >80%). Hence, we decided to perform subset analysis according to effect size type (i.e. RR and HR) to evaluate the possibility of heterogeneity arising from interchangeable use of effect sizes. In the case of studies not stratifying analysis of admission BG level based on diabetic status, corresponding authors were contacted to obtain additional data.

There were at least ten contacts attempted to confirm study settings (i.e. to ascertain whether the blood glucose was obtained in fasting or non-fasting state), verify potential overlapping populations, and/or to obtain additional data for dose-response analysis and/or diabetes-stratified analysis. Seven authors responded to our queries, of which four<sup>12-15</sup> confirmed their study settings and/or overlapping populations, and three<sup>16-18</sup> provided additional data for analysis. Following authors' confirmations, we excluded one study (i.e. Berenguer et al<sup>13</sup>) as the author could not confirm whether the admission blood glucose was obtained in fasting or non-fasting condition. In addition, Li et al<sup>18</sup> confirmed potential overlapping population with Wang et al<sup>19</sup>, Zhang et al<sup>20</sup>, and Zhu et al<sup>21</sup>, thus analysis was prioritized to Wang et al<sup>19</sup> due to larger sample size.

Sensitivity analysis of high vs low meta-analysis was conducted by excluding studies with high risk of bias and sequentially removing each study one by one, while sensitivity analyses of dose-response meta-analysis were conducted for both linear and non-linear trends. Sensitivity analysis of linear trend was conducted by using alternative approaches in assigning the admission BG level for open-ended categories<sup>10,22</sup>, while sensitivity analysis for non-linear dose-response meta-analysis was conducting by using alternative combination of knots locations (i.e. 10th, 25th, 50th, 75th, and 90th percentiles).<sup>23</sup> Meta-analysis was conducted using R ver. 4.0.0 (R Foundation for Statistical Computing, Vienna, Austria)<sup>24</sup> with the additional *meta* (ver. 4.9-6)<sup>25</sup>, *dosresmeta* (ver. 2.0.1)<sup>26</sup>, and *rms* (ver. 6.0-1)<sup>27</sup> packages.

## SUPPLEMENTARY RESULTS

**Table S4.** Characteristics of included studies<sup>a</sup>

| Author;<br>Year                     | Study characteristics       |               |                |                | Patient characteristics                                |                |                      |                |               |               |               |               |               |                 | Marker                   | Admission glucose level<br>(mmol/L) |    | Risk<br>of<br>bias <sup>c</sup> |
|-------------------------------------|-----------------------------|---------------|----------------|----------------|--------------------------------------------------------|----------------|----------------------|----------------|---------------|---------------|---------------|---------------|---------------|-----------------|--------------------------|-------------------------------------|----|---------------------------------|
|                                     | Recruitment<br>period       | Design        | Location       | Sample<br>size | Age (years)                                            | Male<br>(%)    | Co-morbidities; n(%) |                |               |               |               |               |               | Good<br>outcome |                          | Poor<br>outcome <sup>b</sup>        |    |                                 |
|                                     |                             |               |                |                |                                                        |                | Diabetes             | HT             | Stroke        | CVD           | CKD           | Cancer        | CLD           |                 |                          |                                     |    |                                 |
| Bode B;<br>2020 <sup>28</sup>       | 1 Mar - 6 Apr<br>2020       | Retrospective | USA            | 1122           | DM: 65<br>(Range: 24-<br>95)<br>Non-DM: 61<br>(18-101) | 624<br>(55.61) | 451<br>(40.2)        | NR             | NR            | NR            | NR            | NR            | NR            | NR              | RBG                      | NR                                  | NR | +                               |
| Cai Y;<br>2020 <sup>29</sup>        | 20 Jan - 20<br>Feb 2020     | Retrospective | China          | 941            | 57 (Range:<br>18-98)                                   | 454<br>(48.2)  | 123<br>(13.1)        | 272<br>(28.9)  | 64 (6.8)      | NR            | 44<br>(4.7)   | 28 (3)        | 35<br>(3.7)   | FBG             | NR                       | NR                                  | ?  |                                 |
| Cariou B;<br>2020 <sup>30</sup>     | 10 Mar - 10<br>Apr 2020     | Retrospective | France         | 1317           | 69.8±13.0                                              | 855<br>(64.9)  | 1317<br>(100)        | 1003<br>(77.2) | 163<br>(12.9) | 336<br>(26.9) | 60<br>(7.2)   | 194<br>(15.1) | 133<br>(10.4) | RBG             | 8.80<br>(6.70-<br>12.10) | 10.30 (7.10-<br>14.53)***           | ?  |                                 |
| Chang<br>MC;<br>2020 <sup>31</sup>  | 1 Feb - 10 Apr<br>2020      | Retrospective | South<br>Korea | 106            | 67.6±15.3                                              | 54<br>(50.1)   | 42 (39.6)            | 59<br>(55.7)   | 6 (5.7)       | 12<br>(11.3)  | 17<br>(16)    | 9 (8.5)       | 7 (6.6)       | FBG             | 7.7±3.6                  | 10.9±4.3***                         | ?  |                                 |
| Coppelli<br>A; 2020 <sup>15</sup>   | 20 Mar - 30<br>Apr 2020     | Retrospective | Italy          | 271            | 72 (58-82)                                             | 181<br>(66.8)  | 56 (20.7)            | NR             | NR            | NR            | NR            | NR            | NR            | NR              | RBG                      | NR                                  | NR | -                               |
| Deng M;<br>2020 <sup>32</sup>       | Up to 13 Mar<br>2020        | Retrospective | China          | 65             | Severe: 32.5<br>(20.5-37.5)<br>Moderate: 35<br>(29-37) | 36<br>(55.4)   | 2 (3.1)              | 3 (4.6)        | NR            | 0 (0)         | NR            | 1 (1.5)       | NR            | FBG             | 5.15<br>(4.66-<br>5.63)  | 6.77 (5.86-<br>8.92)***             | ?  |                                 |
| Fadini GP;<br>2020 <sup>16</sup>    | 21 Feb - 20<br>Apr 2020     | Retrospective | Italy          | 413            | 64.9±15.4                                              | 245<br>(59.3)  | 306<br>(74.09)       | 212<br>(51.3)  | NR            | 72<br>(18.0)  | 30<br>(7.3)   | 66<br>(16.6)  | 29<br>(7.3)   | FBG             | NR                       | NR                                  | -  |                                 |
| Gao S;<br>2020 <sup>33</sup>        | 23 Jan - 29<br>Feb 2020     | Retrospective | China          | 210            | 71 (67-77)                                             | 101<br>(48.1)  | 38 (18.1)            | 115<br>(54.8)  | 13 (6.2)      | 52<br>(24.8)  | 18<br>(8.6)   | 6 (2.9)       | 3 (1.4)       | FBG             | 5.5 (4.7-<br>6.9)        | 6.9 (5.0-7.9)                       | -  |                                 |
| Gupta R;<br>2020 <sup>34</sup>      | Mar - Apr<br>2020           | Retrospective | USA            | 496            | 70 (60-78)                                             | 260<br>(53.9)  | 276<br>(57.0)        | 406<br>(83.9)  | NR            | 40<br>(8.1)   | 117<br>(23.6) | 44 (9.1)      | 30<br>(6.7)   | RBG             | 7.1 (5.8-<br>10.2)       | 10.1 (72-<br>15.3)***               | ?  |                                 |
| Han M;<br>2020 <sup>35</sup>        | 2 Feb - 15 Feb<br>2020      | Retrospective | China          | 306            | 60 (49-70)                                             | 174<br>(56.9)  | 129<br>(42.2)        | 119<br>(38.9)  | 11 (3.6)      | 25<br>(8.2)   | 4 (1.3)       | 3 (1)         | 18<br>(5.9)   | FBG,<br>RBG     | NR                       | NR                                  | -  |                                 |
| Huang R;<br>2020 <sup>36</sup>      | 22 Jan - 10<br>Feb 2020     | Retrospective | China          | 202            | 44 (33-54)                                             | 116<br>(57.4)  | 19 (9.4)             | 29<br>(14.4)   | 3 (1.5)       | 5 (2.5)       | NR            | 2 (1)         | 7 (3.5)       | FBG             | 5.7 (6.1-<br>6.6)        | 6.5 (5.5-<br>8.0)***                | +  |                                 |
| Iacobellis<br>G; 2020 <sup>37</sup> | 4 Mar - 4 Apr<br>2020       | Retrospective | USA            | 85             | 65 (Range:<br>31-95)                                   | 49<br>(57.6)   | 27 (31.8)            | NR             | NR            | NR            | NR            | NR            | NR            | NR              | RBG                      | NR                                  | NR | +                               |
| Li H;<br>2020 <sup>18</sup>         | 22 Jan - 17<br>Mar 2020     | Retrospective | China          | 453            | 61 (49-68)                                             | 236<br>(52.1)  | 98 (21.6)            | 150<br>(33.1)  | 16 (3.5)      | 44<br>(9.7)   | 8 (1.8)       | 29 (6.4)      | 25<br>(5.5)   | FBG             | NR                       | NR                                  | -  |                                 |
| Li Y;<br>2020 <sup>38</sup>         | 31 Dec 2019 -<br>5 Apr 2020 | Retrospective | China          | 132            | 65 (57-71)                                             | 70<br>(53.0)   | 132 (100)            | 85<br>(64.4)   | 12 (9.1)      | NR            | 4 (3)         | 3 (2.3)       | 4 (3)         | FBG             | NR                       | NR                                  | -  |                                 |
| Liu SP;<br>2020 <sup>39</sup>       | 1 Feb - 24 Feb<br>2020      | Retrospective | China          | 255            | 64 (24-92)                                             | 136<br>(53.3)  | 51 (20)              | 101<br>(39.6)  | NR            | 28<br>(10.9)  | NR            | NR            | 8<br>(31.4)   | FBG             | 5.8 (3.9-<br>18.9)       | 10.1 (4.8-<br>23.1)***              | ?  |                                 |
| Long Q;<br>2020 <sup>17</sup>       | 2 Jan - 15 Feb<br>2020      | Retrospective | China          | 522            | 54.2 (43.3-<br>68.9)                                   | 250<br>(47.9)  | 94 (18.0)            | 130<br>(24.9)  | NR            | 38<br>(7.2)   | NR            | NR            | NR            | FBG             | 6.32<br>(4.89-<br>6.70)  | 8.94 (5.93-<br>10.05)***            | -  |                                 |
| Marcos<br>M; 2020 <sup>12</sup>     | 15 Feb - 28<br>Apr 2020     | Retrospective | Spain          | 918            | 72.8±14.5                                              | 531<br>(57.8)  | 213<br>(23.2)        | 489<br>(53.3)  | 91 (9.9)      | 104<br>(11.3) | 50<br>(5.5)   | 130<br>(14.2) | 115<br>(12.5) | RBG             | 7.2±3.2                  | 8.4±3.9***                          | +  |                                 |

|                                    |                           |               |           |      |                                                  |             |            |            |          |           |          |          |           |     |                                             |                                                |   |
|------------------------------------|---------------------------|---------------|-----------|------|--------------------------------------------------|-------------|------------|------------|----------|-----------|----------|----------|-----------|-----|---------------------------------------------|------------------------------------------------|---|
| Mejia-Vilet JM; 2020 <sup>40</sup> | 16 Mar - 21 May 2020      | Prospective   | Mexico    | 329  | 49 (41-60)                                       | 211 (64.1)  | 80 (24)    | 88 (27)    | NR       | NR        | 19 (6)   | NR       | NR        | RBG | 5.94 (5.38-7.10)                            | 7.66 (6.16-11.82)***                           | - |
| Sardu C; 2020 <sup>14</sup>        | Since 20 Feb 2020         | Retrospective | Italy     | 59   | 67.4±9.87                                        | 48 (81.4)   | 26 (44.1)  | 44 (74.6)  | NR       | 12 (20.3) | NR       | NR       | NR        | RBG | NR                                          | NR                                             | ? |
| Shi Q; 2020 <sup>41</sup>          | 1 Jan - 8 Mar 2020        | Retrospective | China     | 306  | 64.5 (56-72)                                     | 150 (49)    | 153 (50)   | 131 (42.8) | 14 (4.6) | 49 (16)   | 12 (3.9) | 14 (4.6) | 21 (6.9)  | FBG | DM: 8.5 (6.6-12.1)<br>Non-DM: 5.7 (4.8-7.0) | DM: 12.7 (8.8-18.6)*<br>Non-DM: 7.1 (5.1-12.2) | ? |
| Smith SM; 2020 <sup>42</sup>       | 16 Mar - 2 May 2020       | Prospective   | USA       | 184  | 64.4 (Range: 21-100)                             | 98 (53.3)   | 114 (62)   | 111 (60.3) | 10 (5.4) | 22 (12)   | 24 (13)  | 17 (9.2) | 12 (6.5)  | FBG | 9.1                                         | 13.2*                                          | + |
| Tu Y; 2020 <sup>43</sup>           | 10 Jan - 29 Feb 2020      | Retrospective | China     | 75   | 68 (62-74)                                       | 53 (70.7)   | 14 (19)    | 30 (40)    | 5 (7)    | 13 (17)   | 1 (1.3)  | NR       | 7 (9.3)   | RBG | NR                                          | NR                                             | ? |
| Wang F; 2020 <sup>44</sup>         | 29 Jan - 10 Feb 2020      | Retrospective | China     | 28   | 68.6±9.0                                         | 21 (75)     | 28 (100)   | 15 (53.6)  | 4 (14.3) | 4 (14.3)  | 0 (0)    | NR       | 2 (14.3)  | RBG | 9.8±3.4                                     | 13.7±5.1*                                      | + |
| Wang S; 2020 <sup>19</sup>         | 24 Jan - 10 Feb 2020      | Retrospective | China     | 605  | 59 (47-68)                                       | 322 (53.2)  | 0 (0)      | 139 (25.6) | 16 (2.6) | NR        | 16 (2.6) | 29 (4.8) | 18 (3)    | FBG | NR                                          | NR                                             | - |
| Wu C; 2020 <sup>45</sup>           | 25 Dec 2019 - 26 Jan 2020 | Retrospective | China     | 201  | 51 (43-60)                                       | 128 (63.7)  | 22 (10.9)  | 39 (19.4)  | NR       | 8 (4)     | 2 (1)    | 1 (0.5)  | 5 (2.5)   | FBG | 5.4 (4.9-6.5)                               | 7.4 (5.7-10.08)***                             | ? |
| Wu J; 2020 <sup>46</sup>           | 26 Dec 2019 - 15 Mar 2020 | Retrospective | China     | 2387 | Critical: 65 (54-73)<br>Non-critical: 61 (50-69) | 1200 (50.3) | 332 (13.9) | 662 (27.7) | NR       | NR        | 58 (2.4) | 34 (1.4) | 85 (3.6)  | FBG | 5.9 (5.1-7.5)                               | NR                                             | - |
| Yan Y; 2020 <sup>47</sup>          | 10 Jan - 24 Feb 2020      | Retrospective | China     | 192  | 64 (49-73)                                       | 114 (59.1)  | 48 (24.9)  | 73 (37.8)  | 8 (4.1)  | 31 (16.1) | 4 (2.1)  | NR       | 14 (7.3)  | RBG | 9.02 (6.39-13.73)                           | 12.38 (8.39-17.35)                             | - |
| Yang J-K; 2020 <sup>48</sup>       | 29 Jan - 20 Mar 2020      | Retrospective | China     | 69   | 61 (52-67)                                       | 34 (49.3)   | 0 (0.0)    | NR         | NR       | 0 (0.0)   | 0 (0.0)  | NR       | NR        | FBG | 6.1 (5.4-7.0)                               | 7.4 (6.6-9.9)***                               | - |
| Zhang J; 2020 <sup>49</sup>        | 1 Jan - 17 Mar 2020       | Retrospective | China     | 312  | 57 (38-66)                                       | 140 (44.9)  | 84 (26.9)  | 89 (28.5)  | 15 (4.8) | 22 (7.1)  | 8 (2.6)  | 12 (3.8) | 12 (3.8)  | FBG | NR                                          | NR                                             | - |
| Zhang Q; 2020 <sup>50</sup>        | 3 Jan - 14 Feb 2020       | Retrospective | China     | 74   | 62 (56-72)                                       | 36 (48.6)   | 74 (100)   | 35 (47.3)  | 2 (2.7)  | 13 (17.6) | NR       | 7 (9.5)  | NR        | FBG | 7.35 (5.91-10.65)                           | 9.67 (7.72-12.88)*                             | ? |
| Zhang Y; 2020 <sup>20</sup>        | 29 Jan - 12 Feb 2020      | Retrospective | China     | 258  | 64 (56-70)                                       | 138 (53.5)  | 63 (24.4)  | 98 (38)    | 12 (4.7) | 39 (15.1) | 9 (3.5)  | 12 (4.7) | 9 (3.5)   | FBG | NR                                          | NR                                             | - |
| Zhang Y(1); 2020 <sup>51</sup>     | 8 Feb - 21 Mar 2020       | Retrospective | China     | 166  | 62.7±14.2                                        | 85 (51.2)   | 61 (36.8)  | 76 (45.8)  | 12 (7.2) | 30 (18.1) | 9 (5.4)  | 3 (1.8)  | 19 (11.4) | FBG | NR                                          | NR                                             | - |
| Zhou J; 2020 <sup>52</sup>         | 1 Jan - 24 May 2020       | Retrospective | Hong Kong | 1043 | 35 (32-37)                                       | 563 (54)    | 54 (10.1)  | 108 (20.2) | NR       | 10 (1.87) | 21 (3.9) | NR       | 230 (43)  | RBG | 5.33 (4.78-6.45)                            | 5.87 (5.87-6.06)                               | + |
| Zhu B; 2020 <sup>21</sup>          | Jan 2020 - 23 Feb 2020    | Retrospective | China     | 107  | 59.49±13.33                                      | 54 (50.5)   | 13 (12.1)  | 29 (27.1)  | NR       | 10 (9.3)  | NR       | NR       | NR        | FBG | 5.9 (5.4-7.3)                               | 7.0 (6.4-8.2)**                                | - |
| Zhu B(1); 2020 <sup>53</sup>       | 17 Jan - 22 Feb 2020      | Retrospective | China     | 293  | 49 (37-55.5)                                     | 151 (51.5)  | 0 (0.0)    | NR         | NR       | NR        | NR       | NR       | NR        | FBG | 5.3 (4.8-5.9)                               | 7.35 (5.6-9.58)***                             | ? |

\*p<0.05, \*\*p<0.01, \*\*\*p<0.001 vs COVID-19 patients with good outcome.

<sup>a</sup>Unless otherwise specified, data are presented in n(%), mean±SD, or median (IQR). <sup>b</sup>Includes patient with severe/critical COVID-19 and/or death. <sup>c</sup>Assessed using the Quality in Prognostic Studies (QUIPS) tool, +, high risk of bias; ?, moderate risk of bias; -, low risk of bias.

**CLD**, chronic lung disease; **CKD**, chronic kidney disease; **CVD**, cardiovascular disease; **DM**, diabetes mellitus; **FBG**, fasting blood glucose; **IQR**, interquartile range; **NR**, not reported; **RBG**, random blood glucose; **SD**, standard deviation. **USA**, United States of America.



**Figure S1.** Risk of bias summary for included studies as assessed with the Quality in Prognostic Studies tool<sup>4</sup>

|                      | Study participation: description of source of population or population of interest | Study participation: adequate description of sampling frame and recruitment | Study participation: adequate description of recruitment period | Study participation: adequate description of place of recruitment | Study participation: adequate description of inclusion and exclusion criteria | Study participation: adequate participation in the study by eligible individuals | Study participation: description of baseline study sample | Study attrition: adequate response rate for study participants | Study attrition: description of attempts to collect information on participants who dropped out | Study attrition: reasons for loss to follow-up provided | Study attrition: adequate description of participants lost to follow-up | Study attrition: no important differences between participants who completed the study and those who did not | Blood glucose measurement: a clear definition or description of blood glucose measurement is provided | Blood glucose measurement: method of blood glucose measurement is adequately valid and reliable | Blood glucose measurement: continuous variables reported or appropriate cut points used | Blood glucose measurement: method and setting of measurement of blood glucose is the same for all study participants | Blood glucose measurement: adequate proportion of the study sample has complete data for blood glucose variable | Outcome measurement: clear definition of the outcome provided | Outcome measurement: method of outcome measurement used is adequately valid and reliable | Outcome measurement: method and setting of outcome measurement is the same for all study participants | Study confounding: important confounders are measured | Study confounding: clear definitions of the important confounders measured are provided | Study confounding: measurement of confounders is adequately valid and reliable | Study confounding: same method and setting of confounding measurement in all study participants | Study confounding: appropriate methods are used if imputation is used for missing confounder data | Study confounding: important potential confounders are accounted for in the study design | Study confounding: important potential confounders are accounted for in the analysis | Statistical analysis and reporting: sufficient presentation of data to assess the adequacy of the analysis | Statistical analysis and reporting: the selected statistical model is adequate for the design of the study |
|----------------------|------------------------------------------------------------------------------------|-----------------------------------------------------------------------------|-----------------------------------------------------------------|-------------------------------------------------------------------|-------------------------------------------------------------------------------|----------------------------------------------------------------------------------|-----------------------------------------------------------|----------------------------------------------------------------|-------------------------------------------------------------------------------------------------|---------------------------------------------------------|-------------------------------------------------------------------------|--------------------------------------------------------------------------------------------------------------|-------------------------------------------------------------------------------------------------------|-------------------------------------------------------------------------------------------------|-----------------------------------------------------------------------------------------|----------------------------------------------------------------------------------------------------------------------|-----------------------------------------------------------------------------------------------------------------|---------------------------------------------------------------|------------------------------------------------------------------------------------------|-------------------------------------------------------------------------------------------------------|-------------------------------------------------------|-----------------------------------------------------------------------------------------|--------------------------------------------------------------------------------|-------------------------------------------------------------------------------------------------|---------------------------------------------------------------------------------------------------|------------------------------------------------------------------------------------------|--------------------------------------------------------------------------------------|------------------------------------------------------------------------------------------------------------|------------------------------------------------------------------------------------------------------------|
| Berenguer J; 2020    | ●                                                                                  | ●                                                                           | ●                                                               | ●                                                                 | ●                                                                             | ●                                                                                | ●                                                         | ●                                                              | ●                                                                                               | ●                                                       | ●                                                                       | ●                                                                                                            | ●                                                                                                     | ●                                                                                               | ●                                                                                       | ●                                                                                                                    | ●                                                                                                               | ●                                                             | ●                                                                                        | ●                                                                                                     | ●                                                     | ●                                                                                       | ●                                                                              | ●                                                                                               | ●                                                                                                 | ●                                                                                        | ●                                                                                    | ●                                                                                                          | ●                                                                                                          |
| Bode B; 2020         | ●                                                                                  | ●                                                                           | ●                                                               | ●                                                                 | ●                                                                             | ●                                                                                | ●                                                         | ●                                                              | ●                                                                                               | ●                                                       | ●                                                                       | ●                                                                                                            | ●                                                                                                     | ●                                                                                               | ●                                                                                       | ●                                                                                                                    | ●                                                                                                               | ●                                                             | ●                                                                                        | ●                                                                                                     | ●                                                     | ●                                                                                       | ●                                                                              | ●                                                                                               | ●                                                                                                 | ●                                                                                        | ●                                                                                    | ●                                                                                                          | ●                                                                                                          |
| Cai Y; 2020          | ●                                                                                  | ●                                                                           | ●                                                               | ●                                                                 | ●                                                                             | ●                                                                                | ●                                                         | ●                                                              | ●                                                                                               | ●                                                       | ●                                                                       | ●                                                                                                            | ●                                                                                                     | ●                                                                                               | ●                                                                                       | ●                                                                                                                    | ●                                                                                                               | ●                                                             | ●                                                                                        | ●                                                                                                     | ●                                                     | ●                                                                                       | ●                                                                              | ●                                                                                               | ●                                                                                                 | ●                                                                                        | ●                                                                                    | ●                                                                                                          | ●                                                                                                          |
| Cariou B; 2020       | ●                                                                                  | ●                                                                           | ●                                                               | ●                                                                 | ●                                                                             | ●                                                                                | ●                                                         | ●                                                              | ●                                                                                               | ●                                                       | ●                                                                       | ●                                                                                                            | ●                                                                                                     | ●                                                                                               | ●                                                                                       | ●                                                                                                                    | ●                                                                                                               | ●                                                             | ●                                                                                        | ●                                                                                                     | ●                                                     | ●                                                                                       | ●                                                                              | ●                                                                                               | ●                                                                                                 | ●                                                                                        | ●                                                                                    | ●                                                                                                          | ●                                                                                                          |
| Chang MC; 2020       | ●                                                                                  | ●                                                                           | ●                                                               | ●                                                                 | ●                                                                             | ●                                                                                | ●                                                         | ●                                                              | ●                                                                                               | ●                                                       | ●                                                                       | ●                                                                                                            | ●                                                                                                     | ●                                                                                               | ●                                                                                       | ●                                                                                                                    | ●                                                                                                               | ●                                                             | ●                                                                                        | ●                                                                                                     | ●                                                     | ●                                                                                       | ●                                                                              | ●                                                                                               | ●                                                                                                 | ●                                                                                        | ●                                                                                    | ●                                                                                                          | ●                                                                                                          |
| Copelli A; 2020      | ●                                                                                  | ●                                                                           | ●                                                               | ●                                                                 | ●                                                                             | ●                                                                                | ●                                                         | ●                                                              | ●                                                                                               | ●                                                       | ●                                                                       | ●                                                                                                            | ●                                                                                                     | ●                                                                                               | ●                                                                                       | ●                                                                                                                    | ●                                                                                                               | ●                                                             | ●                                                                                        | ●                                                                                                     | ●                                                     | ●                                                                                       | ●                                                                              | ●                                                                                               | ●                                                                                                 | ●                                                                                        | ●                                                                                    | ●                                                                                                          | ●                                                                                                          |
| Deng M; 2020         | ●                                                                                  | ●                                                                           | ●                                                               | ●                                                                 | ●                                                                             | ●                                                                                | ●                                                         | ●                                                              | ●                                                                                               | ●                                                       | ●                                                                       | ●                                                                                                            | ●                                                                                                     | ●                                                                                               | ●                                                                                       | ●                                                                                                                    | ●                                                                                                               | ●                                                             | ●                                                                                        | ●                                                                                                     | ●                                                     | ●                                                                                       | ●                                                                              | ●                                                                                               | ●                                                                                                 | ●                                                                                        | ●                                                                                    | ●                                                                                                          | ●                                                                                                          |
| Fadini PG; 2020      | ●                                                                                  | ●                                                                           | ●                                                               | ●                                                                 | ●                                                                             | ●                                                                                | ●                                                         | ●                                                              | ●                                                                                               | ●                                                       | ●                                                                       | ●                                                                                                            | ●                                                                                                     | ●                                                                                               | ●                                                                                       | ●                                                                                                                    | ●                                                                                                               | ●                                                             | ●                                                                                        | ●                                                                                                     | ●                                                     | ●                                                                                       | ●                                                                              | ●                                                                                               | ●                                                                                                 | ●                                                                                        | ●                                                                                    | ●                                                                                                          | ●                                                                                                          |
| Gao S; 2020          | ●                                                                                  | ●                                                                           | ●                                                               | ●                                                                 | ●                                                                             | ●                                                                                | ●                                                         | ●                                                              | ●                                                                                               | ●                                                       | ●                                                                       | ●                                                                                                            | ●                                                                                                     | ●                                                                                               | ●                                                                                       | ●                                                                                                                    | ●                                                                                                               | ●                                                             | ●                                                                                        | ●                                                                                                     | ●                                                     | ●                                                                                       | ●                                                                              | ●                                                                                               | ●                                                                                                 | ●                                                                                        | ●                                                                                    | ●                                                                                                          | ●                                                                                                          |
| Gupta R; 2020        | ●                                                                                  | ●                                                                           | ●                                                               | ●                                                                 | ●                                                                             | ●                                                                                | ●                                                         | ●                                                              | ●                                                                                               | ●                                                       | ●                                                                       | ●                                                                                                            | ●                                                                                                     | ●                                                                                               | ●                                                                                       | ●                                                                                                                    | ●                                                                                                               | ●                                                             | ●                                                                                        | ●                                                                                                     | ●                                                     | ●                                                                                       | ●                                                                              | ●                                                                                               | ●                                                                                                 | ●                                                                                        | ●                                                                                    | ●                                                                                                          | ●                                                                                                          |
| Han M; 2020          | ●                                                                                  | ●                                                                           | ●                                                               | ●                                                                 | ●                                                                             | ●                                                                                | ●                                                         | ●                                                              | ●                                                                                               | ●                                                       | ●                                                                       | ●                                                                                                            | ●                                                                                                     | ●                                                                                               | ●                                                                                       | ●                                                                                                                    | ●                                                                                                               | ●                                                             | ●                                                                                        | ●                                                                                                     | ●                                                     | ●                                                                                       | ●                                                                              | ●                                                                                               | ●                                                                                                 | ●                                                                                        | ●                                                                                    | ●                                                                                                          | ●                                                                                                          |
| Huang R; 2020        | ●                                                                                  | ●                                                                           | ●                                                               | ●                                                                 | ●                                                                             | ●                                                                                | ●                                                         | ●                                                              | ●                                                                                               | ●                                                       | ●                                                                       | ●                                                                                                            | ●                                                                                                     | ●                                                                                               | ●                                                                                       | ●                                                                                                                    | ●                                                                                                               | ●                                                             | ●                                                                                        | ●                                                                                                     | ●                                                     | ●                                                                                       | ●                                                                              | ●                                                                                               | ●                                                                                                 | ●                                                                                        | ●                                                                                    | ●                                                                                                          | ●                                                                                                          |
| Iacobellis G; 2020   | ●                                                                                  | ●                                                                           | ●                                                               | ●                                                                 | ●                                                                             | ●                                                                                | ●                                                         | ●                                                              | ●                                                                                               | ●                                                       | ●                                                                       | ●                                                                                                            | ●                                                                                                     | ●                                                                                               | ●                                                                                       | ●                                                                                                                    | ●                                                                                                               | ●                                                             | ●                                                                                        | ●                                                                                                     | ●                                                     | ●                                                                                       | ●                                                                              | ●                                                                                               | ●                                                                                                 | ●                                                                                        | ●                                                                                    | ●                                                                                                          | ●                                                                                                          |
| Li H; 2020           | ●                                                                                  | ●                                                                           | ●                                                               | ●                                                                 | ●                                                                             | ●                                                                                | ●                                                         | ●                                                              | ●                                                                                               | ●                                                       | ●                                                                       | ●                                                                                                            | ●                                                                                                     | ●                                                                                               | ●                                                                                       | ●                                                                                                                    | ●                                                                                                               | ●                                                             | ●                                                                                        | ●                                                                                                     | ●                                                     | ●                                                                                       | ●                                                                              | ●                                                                                               | ●                                                                                                 | ●                                                                                        | ●                                                                                    | ●                                                                                                          | ●                                                                                                          |
| Liu SP; 2020         | ●                                                                                  | ●                                                                           | ●                                                               | ●                                                                 | ●                                                                             | ●                                                                                | ●                                                         | ●                                                              | ●                                                                                               | ●                                                       | ●                                                                       | ●                                                                                                            | ●                                                                                                     | ●                                                                                               | ●                                                                                       | ●                                                                                                                    | ●                                                                                                               | ●                                                             | ●                                                                                        | ●                                                                                                     | ●                                                     | ●                                                                                       | ●                                                                              | ●                                                                                               | ●                                                                                                 | ●                                                                                        | ●                                                                                    | ●                                                                                                          | ●                                                                                                          |
| Li Y; 2020           | ●                                                                                  | ●                                                                           | ●                                                               | ●                                                                 | ●                                                                             | ●                                                                                | ●                                                         | ●                                                              | ●                                                                                               | ●                                                       | ●                                                                       | ●                                                                                                            | ●                                                                                                     | ●                                                                                               | ●                                                                                       | ●                                                                                                                    | ●                                                                                                               | ●                                                             | ●                                                                                        | ●                                                                                                     | ●                                                     | ●                                                                                       | ●                                                                              | ●                                                                                               | ●                                                                                                 | ●                                                                                        | ●                                                                                    | ●                                                                                                          | ●                                                                                                          |
| Long Q; 2020         | ●                                                                                  | ●                                                                           | ●                                                               | ●                                                                 | ●                                                                             | ●                                                                                | ●                                                         | ●                                                              | ●                                                                                               | ●                                                       | ●                                                                       | ●                                                                                                            | ●                                                                                                     | ●                                                                                               | ●                                                                                       | ●                                                                                                                    | ●                                                                                                               | ●                                                             | ●                                                                                        | ●                                                                                                     | ●                                                     | ●                                                                                       | ●                                                                              | ●                                                                                               | ●                                                                                                 | ●                                                                                        | ●                                                                                    | ●                                                                                                          | ●                                                                                                          |
| Marcos M; 2020       | ●                                                                                  | ●                                                                           | ●                                                               | ●                                                                 | ●                                                                             | ●                                                                                | ●                                                         | ●                                                              | ●                                                                                               | ●                                                       | ●                                                                       | ●                                                                                                            | ●                                                                                                     | ●                                                                                               | ●                                                                                       | ●                                                                                                                    | ●                                                                                                               | ●                                                             | ●                                                                                        | ●                                                                                                     | ●                                                     | ●                                                                                       | ●                                                                              | ●                                                                                               | ●                                                                                                 | ●                                                                                        | ●                                                                                    | ●                                                                                                          | ●                                                                                                          |
| Mejia-Vilet JM; 2020 | ●                                                                                  | ●                                                                           | ●                                                               | ●                                                                 | ●                                                                             | ●                                                                                | ●                                                         | ●                                                              | ●                                                                                               | ●                                                       | ●                                                                       | ●                                                                                                            | ●                                                                                                     | ●                                                                                               | ●                                                                                       | ●                                                                                                                    | ●                                                                                                               | ●                                                             | ●                                                                                        | ●                                                                                                     | ●                                                     | ●                                                                                       | ●                                                                              | ●                                                                                               | ●                                                                                                 | ●                                                                                        | ●                                                                                    | ●                                                                                                          | ●                                                                                                          |
| Sardu C; 2020        | ●                                                                                  | ●                                                                           | ●                                                               | ●                                                                 | ●                                                                             | ●                                                                                | ●                                                         | ●                                                              | ●                                                                                               | ●                                                       | ●                                                                       | ●                                                                                                            | ●                                                                                                     | ●                                                                                               | ●                                                                                       | ●                                                                                                                    | ●                                                                                                               | ●                                                             | ●                                                                                        | ●                                                                                                     | ●                                                     | ●                                                                                       | ●                                                                              | ●                                                                                               | ●                                                                                                 | ●                                                                                        | ●                                                                                    | ●                                                                                                          | ●                                                                                                          |
| Shi Q; 2020          | ●                                                                                  | ●                                                                           | ●                                                               | ●                                                                 | ●                                                                             | ●                                                                                | ●                                                         | ●                                                              | ●                                                                                               | ●                                                       | ●                                                                       | ●                                                                                                            | ●                                                                                                     | ●                                                                                               | ●                                                                                       | ●                                                                                                                    | ●                                                                                                               | ●                                                             | ●                                                                                        | ●                                                                                                     | ●                                                     | ●                                                                                       | ●                                                                              | ●                                                                                               | ●                                                                                                 | ●                                                                                        | ●                                                                                    | ●                                                                                                          | ●                                                                                                          |
| Smith SM; 2020       | ●                                                                                  | ●                                                                           | ●                                                               | ●                                                                 | ●                                                                             | ●                                                                                | ●                                                         | ●                                                              | ●                                                                                               | ●                                                       | ●                                                                       | ●                                                                                                            | ●                                                                                                     | ●                                                                                               | ●                                                                                       | ●                                                                                                                    | ●                                                                                                               | ●                                                             | ●                                                                                        | ●                                                                                                     | ●                                                     | ●                                                                                       | ●                                                                              | ●                                                                                               | ●                                                                                                 | ●                                                                                        | ●                                                                                    | ●                                                                                                          | ●                                                                                                          |
| Tu Y; 2020           | ●                                                                                  | ●                                                                           | ●                                                               | ●                                                                 | ●                                                                             | ●                                                                                | ●                                                         | ●                                                              | ●                                                                                               | ●                                                       | ●                                                                       | ●                                                                                                            | ●                                                                                                     | ●                                                                                               | ●                                                                                       | ●                                                                                                                    | ●                                                                                                               | ●                                                             | ●                                                                                        | ●                                                                                                     | ●                                                     | ●                                                                                       | ●                                                                              | ●                                                                                               | ●                                                                                                 | ●                                                                                        | ●                                                                                    | ●                                                                                                          | ●                                                                                                          |
| Wang F; 2020         | ●                                                                                  | ●                                                                           | ●                                                               | ●                                                                 | ●                                                                             | ●                                                                                | ●                                                         | ●                                                              | ●                                                                                               | ●                                                       | ●                                                                       | ●                                                                                                            | ●                                                                                                     | ●                                                                                               | ●                                                                                       | ●                                                                                                                    | ●                                                                                                               | ●                                                             | ●                                                                                        | ●                                                                                                     | ●                                                     | ●                                                                                       | ●                                                                              | ●                                                                                               | ●                                                                                                 | ●                                                                                        | ●                                                                                    | ●                                                                                                          | ●                                                                                                          |
| Wang S; 2020         | ●                                                                                  | ●                                                                           | ●                                                               | ●                                                                 | ●                                                                             | ●                                                                                | ●                                                         | ●                                                              | ●                                                                                               | ●                                                       | ●                                                                       | ●                                                                                                            | ●                                                                                                     | ●                                                                                               | ●                                                                                       | ●                                                                                                                    | ●                                                                                                               | ●                                                             | ●                                                                                        | ●                                                                                                     | ●                                                     | ●                                                                                       | ●                                                                              | ●                                                                                               | ●                                                                                                 | ●                                                                                        | ●                                                                                    | ●                                                                                                          | ●                                                                                                          |
| Wu C; 2020           | ●                                                                                  | ●                                                                           | ●                                                               | ●                                                                 | ●                                                                             | ●                                                                                | ●                                                         | ●                                                              | ●                                                                                               | ●                                                       | ●                                                                       | ●                                                                                                            | ●                                                                                                     | ●                                                                                               | ●                                                                                       | ●                                                                                                                    | ●                                                                                                               | ●                                                             | ●                                                                                        | ●                                                                                                     | ●                                                     | ●                                                                                       | ●                                                                              | ●                                                                                               | ●                                                                                                 | ●                                                                                        | ●                                                                                    | ●                                                                                                          | ●                                                                                                          |
| Wu J; 2020           | ●                                                                                  | ●                                                                           | ●                                                               | ●                                                                 | ●                                                                             | ●                                                                                | ●                                                         | ●                                                              | ●                                                                                               | ●                                                       | ●                                                                       | ●                                                                                                            | ●                                                                                                     | ●                                                                                               | ●                                                                                       | ●                                                                                                                    | ●                                                                                                               | ●                                                             | ●                                                                                        | ●                                                                                                     | ●                                                     | ●                                                                                       | ●                                                                              | ●                                                                                               | ●                                                                                                 | ●                                                                                        | ●                                                                                    | ●                                                                                                          | ●                                                                                                          |
| Yang J-K; 2020       | ●                                                                                  | ●                                                                           | ●                                                               | ●                                                                 | ●                                                                             | ●                                                                                | ●                                                         | ●                                                              | ●                                                                                               | ●                                                       | ●                                                                       | ●                                                                                                            | ●                                                                                                     | ●                                                                                               | ●                                                                                       | ●                                                                                                                    | ●                                                                                                               | ●                                                             | ●                                                                                        | ●                                                                                                     | ●                                                     | ●                                                                                       | ●                                                                              | ●                                                                                               | ●                                                                                                 | ●                                                                                        | ●                                                                                    | ●                                                                                                          | ●                                                                                                          |
| Yan Y; 2020          | ●                                                                                  | ●                                                                           | ●                                                               | ●                                                                 | ●                                                                             | ●                                                                                | ●                                                         | ●                                                              | ●                                                                                               | ●                                                       | ●                                                                       | ●                                                                                                            | ●                                                                                                     | ●                                                                                               | ●                                                                                       | ●                                                                                                                    | ●                                                                                                               | ●                                                             | ●                                                                                        | ●                                                                                                     | ●                                                     | ●                                                                                       | ●                                                                              | ●                                                                                               | ●                                                                                                 | ●                                                                                        | ●                                                                                    | ●                                                                                                          | ●                                                                                                          |
| Zhang J; 2020        | ●                                                                                  | ●                                                                           | ●                                                               | ●                                                                 | ●                                                                             | ●                                                                                | ●                                                         | ●                                                              | ●                                                                                               | ●                                                       | ●                                                                       | ●                                                                                                            | ●                                                                                                     | ●                                                                                               | ●                                                                                       | ●                                                                                                                    | ●                                                                                                               | ●                                                             | ●                                                                                        | ●                                                                                                     | ●                                                     | ●                                                                                       | ●                                                                              | ●                                                                                               | ●                                                                                                 | ●                                                                                        | ●                                                                                    | ●                                                                                                          | ●                                                                                                          |
| Zhang Q; 2020        | ●                                                                                  | ●                                                                           | ●                                                               | ●                                                                 | ●                                                                             | ●                                                                                | ●                                                         | ●                                                              | ●                                                                                               | ●                                                       | ●                                                                       | ●                                                                                                            | ●                                                                                                     | ●                                                                                               | ●                                                                                       | ●                                                                                                                    | ●                                                                                                               | ●                                                             | ●                                                                                        | ●                                                                                                     | ●                                                     | ●                                                                                       | ●                                                                              | ●                                                                                               | ●                                                                                                 | ●                                                                                        | ●                                                                                    | ●                                                                                                          | ●                                                                                                          |
| Zhang Y; 2020        | ●                                                                                  | ●                                                                           | ●                                                               | ●                                                                 | ●                                                                             | ●                                                                                | ●                                                         | ●                                                              | ●                                                                                               | ●                                                       | ●                                                                       | ●                                                                                                            | ●                                                                                                     | ●                                                                                               | ●                                                                                       | ●                                                                                                                    | ●                                                                                                               | ●                                                             | ●                                                                                        | ●                                                                                                     | ●                                                     | ●                                                                                       | ●                                                                              | ●                                                                                               | ●                                                                                                 | ●                                                                                        | ●                                                                                    | ●                                                                                                          | ●                                                                                                          |
| Zhang Y (1); 2020    | ●                                                                                  | ●                                                                           | ●                                                               | ●                                                                 | ●                                                                             | ●                                                                                | ●                                                         | ●                                                              | ●                                                                                               | ●                                                       | ●                                                                       | ●                                                                                                            | ●                                                                                                     | ●                                                                                               | ●                                                                                       | ●                                                                                                                    | ●                                                                                                               | ●                                                             | ●                                                                                        | ●                                                                                                     | ●                                                     | ●                                                                                       | ●                                                                              | ●                                                                                               | ●                                                                                                 | ●                                                                                        | ●                                                                                    | ●                                                                                                          | ●                                                                                                          |
| Zhou J; 2020         | ●                                                                                  | ●                                                                           | ●                                                               | ●                                                                 | ●                                                                             | ●                                                                                | ●                                                         | ●                                                              | ●                                                                                               | ●                                                       | ●                                                                       | ●                                                                                                            | ●                                                                                                     | ●                                                                                               | ●                                                                                       | ●                                                                                                                    | ●                                                                                                               | ●                                                             | ●                                                                                        | ●                                                                                                     | ●                                                     | ●                                                                                       | ●                                                                              | ●                                                                                               | ●                                                                                                 | ●                                                                                        | ●                                                                                    | ●                                                                                                          | ●                                                                                                          |
| Zhu B; 2020          | ●                                                                                  | ●                                                                           | ●                                                               | ●                                                                 | ●                                                                             | ●                                                                                | ●                                                         | ●                                                              | ●                                                                                               | ●                                                       | ●                                                                       | ●                                                                                                            | ●                                                                                                     | ●                                                                                               | ●                                                                                       | ●                                                                                                                    | ●                                                                                                               | ●                                                             | ●                                                                                        | ●                                                                                                     | ●                                                     | ●                                                                                       | ●                                                                              | ●                                                                                               | ●                                                                                                 | ●                                                                                        | ●                                                                                    | ●                                                                                                          | ●                                                                                                          |
| Zhu B (1); 2020      | ●                                                                                  | ●                                                                           | ●                                                               | ●                                                                 | ●                                                                             | ●                                                                                | ●                                                         | ●                                                              | ●                                                                                               | ●                                                       | ●                                                                       | ●                                                                                                            | ●                                                                                                     | ●                                                                                               | ●                                                                                       | ●                                                                                                                    | ●                                                                                                               | ●                                                             | ●                                                                                        | ●                                                                                                     | ●                                                     | ●                                                                                       | ●                                                                              | ●                                                                                               | ●                                                                                                 | ●                                                                                        | ●                                                                                    | ●                                                                                                          | ●                                                                                                          |

**Table S5.** Pooled unadjusted estimates of high vs low meta-analysis on the association between admission blood glucose and outcomes of COVID-19 patients

| Outcomes                            | Studies                                  | Events/N  | RR (95% CI)        | Heterogeneity  |                            |
|-------------------------------------|------------------------------------------|-----------|--------------------|----------------|----------------------------|
|                                     |                                          |           |                    | I <sup>2</sup> | P <sub>heterogeneity</sub> |
| Fasting blood glucose               |                                          |           |                    |                |                            |
| Poor composite outcome              | 4 <sup>16,18,49,51</sup>                 | 429/1184  | 1.68 (1.26-2.26)   | 88%            | <0.001                     |
| Mortality <sup>a</sup>              | 13 <sup>16-19,33,35,38,45,46,48</sup>    | 797/4688  | 1.86 (1.53-2.27)   | 92%            | <0.001                     |
| Severity <sup>a</sup>               | 11 <sup>17-19,32,38,45,46,48,51,53</sup> | 1270/3949 | 3.26 (2.17-4.90)   | 96%            | <0.001                     |
| ICU admission                       | 5 <sup>18,38,39,49,51</sup>              | 97/1220   | 5.75 (1.75-18.92)  | 78%            | 0.001                      |
| Invasive ventilation                | 5 <sup>17,18,38,49,51</sup>              | 262/1216  | 2.17 (1.53-3.05)   | 0%             | 0.660                      |
| Acute respiratory distress syndrome | 3 <sup>18,38,49</sup>                    | 59/799    | 3.86 (1.71-8.69)   | 21%            | 0.284                      |
| Shock                               | 2 <sup>18,49</sup>                       | 54/667    | 10.09 (4.34-23.48) | 0%             | 0.962                      |
| Random blood glucose                |                                          |           |                    |                |                            |
| Mortality                           | 4 <sup>14,15,28,35</sup>                 | 203/1150  | 3.64 (2.49-5.31)   | 39%            | 0.175                      |
| ICU admission                       | 3 <sup>14,15,40</sup>                    | 185/514   | 1.70 (1.43-2.03)   | 0%             | 0.620                      |
| Invasive ventilation                | 2 <sup>14,15</sup>                       | 53/274    | 3.02 (1.84-4.96)   | 0%             | 0.801                      |

<sup>a</sup>Overlapping populations were observed between Li et al<sup>18</sup>, Wang et al<sup>19</sup>, and Zhu et al<sup>21</sup>, of which Wang et al<sup>19</sup> was prioritized for analysis due to larger sample size. **COVID-19**, coronavirus disease 2019; **ICU**, intensive care unit

**Table S6.** Summary of certainty of evidence as assessed with the GRADE approach<sup>a</sup>

| Outcome                                         | k  | N    | Univariate               |   |   | Multivariate           |   |   | Phase <sup>b</sup> | GRADE                     |                        |                        |                      |                        |                         |                                           | Overall quality                        |
|-------------------------------------------------|----|------|--------------------------|---|---|------------------------|---|---|--------------------|---------------------------|------------------------|------------------------|----------------------|------------------------|-------------------------|-------------------------------------------|----------------------------------------|
|                                                 |    |      | +                        | 0 | - | +                      | 0 | - |                    | Study limit. <sup>c</sup> | Inconsist <sup>d</sup> | Indirect. <sup>e</sup> | Imprec. <sup>f</sup> | Pub. bias <sup>g</sup> | Mod- lg ES <sup>h</sup> | Exp-resp grad. (RR per 1 mmol/L [95% CI]) |                                        |
| <b>Prognostic factor: Fasting blood glucose</b> |    |      |                          |   |   |                        |   |   |                    |                           |                        |                        |                      |                        |                         |                                           |                                        |
| Poor composite outcome                          | 4  | 1184 | 4                        | 0 | 0 | 4                      | 0 | 0 | 1&2                | ✓                         | ✗                      | ✓                      | ✗                    | ✓                      | ✗                       | ✓                                         | ⊕⊕⊕○<br>MODERATE <sup>i</sup>          |
|                                                 | 4  | 1184 | RR 1.68<br>(1.26-2.26)   |   |   | RR 1.20<br>(1.04-1.39) |   |   | 1&2                | ✓                         | ✗✗                     | ✓                      | ✓                    | ✓                      | ✗                       | ✗                                         | ✗<br>(Linear: 1.23<br>[0.90-1.68])     |
| Mortality                                       | 17 | 5514 | 11                       | 4 | 0 | 12                     | 2 | 0 | 1&2                | ✓                         | ✗                      | ✓                      | ✗                    | ✓                      | ✗                       | ✓                                         | ⊕⊕⊕○<br>MODERATE <sup>k</sup>          |
|                                                 | 13 | 4794 | RR 1.86<br>(1.53-2.27)   |   |   | RR 1.81<br>(1.41-2.33) |   |   | 1&2                | ✓                         | ✗✗                     | ✓                      | ✓                    | ✗                      | ✗                       | ✗                                         | ✗ (Linear: 1.25<br>[0.96-1.63])        |
| Severity                                        | 15 | 4764 | 13                       | 2 | 0 | 7                      | 0 | 0 | 1&2                | ✓                         | ✓                      | ✓                      | ✗                    | ✓                      | ✗                       | ✓                                         | ⊕⊕⊕⊕<br>HIGH                           |
|                                                 | 9  | 3949 | RR 3.26<br>(2.17-4.90)   |   |   | RR 3.65<br>(2.31-5.75) |   |   | 1&2                | ✓                         | ✗                      | ✓                      | ✗                    | ✓                      | ✓                       | ✓                                         | ✓<br>(Non-linear: 1.34<br>[1.27-1.41]) |
| ICU admission                                   | 5  | 1220 | 2                        | 3 | 0 | 1                      | 0 | 0 | 1&2                | ✓                         | ✗                      | ✓                      | ✗✗                   | ✓                      | ✓                       | ✓                                         | ⊕⊕○○<br>LOW                            |
|                                                 | 5  | 1220 | RR 5.75<br>(1.75-18.92)  |   |   |                        |   |   | 1&2                | ✓                         | ✗✗                     | ✗                      | ✗✗                   | ✓                      | ✓✓                      | ✗                                         | ⊕○○○<br>VERY LOW <sup>k</sup>          |
| Invasive ventilation                            | 6  | 1400 | 3                        | 3 | 0 | 1                      | 0 | 0 | 1                  | ✓                         | ✓                      | ✗                      | ✗                    | ✓                      | ✓                       | ✗                                         | ⊕⊕○○<br>LOW                            |
|                                                 | 5  | 1216 | RR 2.17<br>(1.53-3.05)   |   |   |                        |   |   | 1                  | ✓                         | ✓                      | ✗                      | ✗                    | ✓                      | ✓                       | ✗                                         | ⊕⊕○○<br>LOW <sup>k</sup>               |
| ARDS                                            | 3  | 799  | 3                        | 0 | 0 |                        |   |   | 1                  | ✓                         | ✓                      | ✗                      | ✗✗                   | ✗                      | ✓                       | ✗                                         | ⊕○○○<br>VERY LOW                       |
|                                                 | 3  | 799  | RR 3.86<br>(1.71-8.69)   |   |   |                        |   |   | 1                  | ✓                         | ✗                      | ✗                      | ✗                    | ✓                      | ✓                       | ✗                                         | ⊕○○○<br>VERY LOW <sup>k</sup>          |
| Shock                                           | 2  | 667  | 2                        | 0 | 0 |                        |   |   | 1                  | ✓                         | ✗                      | ✗✗                     | ✗✗                   | ✗                      | ✓✓                      | ✗                                         | ⊕○○○<br>VERY LOW                       |
|                                                 | 2  | 667  | RR 10.09<br>(4.34-23.48) |   |   |                        |   |   | 1                  | ✓                         | ✓                      | ✗✗                     | ✗✗                   | ✓                      | ✓✓                      | ✗                                         | ⊕○○○<br>VERY LOW <sup>k</sup>          |
| <b>Prognostic factor: Random blood glucose</b>  |    |      |                          |   |   |                        |   |   |                    |                           |                        |                        |                      |                        |                         |                                           |                                        |
| Poor composite outcome                          | 2  | 1376 | 2                        | 0 | 0 | 1                      | 1 | 0 | 1                  | ✗                         | ✓                      | ✓                      | ✗                    | ✗                      | ✗                       | ✓                                         | ⊕○○○<br>VERY LOW                       |

|                      |   |      |                        |   |   |                        |   |   |     |   |    |   |    |   |   |   |                               |
|----------------------|---|------|------------------------|---|---|------------------------|---|---|-----|---|----|---|----|---|---|---|-------------------------------|
| Mortality            | 7 | 3155 | 5                      | 2 | 0 | 1                      | 1 | 0 | 1&2 | X | X  | ✓ | X  | X | ✓ | ✓ | ⊕⊕○○<br>LOW                   |
|                      | 4 | 1150 | RR 3.64<br>(2.49-5.31) |   |   |                        |   |   | 1&2 | X | X  | ✓ | X  | ✓ | ✓ | X | ⊕⊕○○<br>LOW <sup>k</sup>      |
| ICU admission        | 4 | 725  | 3                      | 1 | 0 | 2                      | 0 | 0 | 1&2 | X | ✓  | X | X  | ✓ | X | X | ⊕○○○<br>VERY LOW              |
|                      | 3 | 514  | RR 1.70<br>(1.43-2.03) |   |   | RR 1.25<br>(0.84-1.84) |   |   | 1&2 | ✓ | XX | ✓ | XX | ✓ | X | X | ⊕○○○<br>VERY LOW <sup>k</sup> |
| Invasive ventilation | 3 | 349  | 3                      | 0 | 0 | 1                      | 0 | 0 | 1&2 | X | ✓  | X | X  | X | ✓ | X | ⊕○○○<br>VERY LOW              |
|                      | 2 | 274  | RR 3.02<br>(1.84-4.96) |   |   |                        |   |   | 2   | X | ✓  | X | XX | X | ✓ | X | ⊕○○○<br>VERY LOW <sup>k</sup> |
| ARDS                 | 2 | 300  | 1                      | 0 | 0 | 1                      | 0 | 0 | 1   | X | ✓  | X | X  | X | X | X | ⊕○○○<br>VERY LOW              |

<sup>a</sup>For qualitative assessments: +, number of studies reporting significant effects with a positive value; 0, number of studies reporting non-significant effects; -, number of studies reporting significant effects with a negative value. For GRADE factors: ✓, no serious limitations; X, serious limitations (or not present for moderate/large effect size and exposure-response gradient); XX, very serious limitations (downgraded by two levels). For overall quality: high, we are very confident that the true effect lies close to that of the estimated effect; moderate, we are moderately confident in the effect estimate and the true effect is likely to be close to the estimate of the effect, but there is a possibility that it is substantially different; low, confidence in the effect estimate is limited and the true effect may be substantially different from the estimate of the effect; very low, we have very little confidence in the effect estimate and the true effect is likely to be substantially different from the estimate of effect

<sup>b</sup>GRADE assessment of outcomes with phase 1 and 2 studies starts with high quality of evidence, while assessment of outcomes with only phase 1 studies starts with moderate quality of evidence.<sup>54</sup>

<sup>c</sup>Downgraded for study limitation by one level when >50% studies yielded moderate-to-high risk of bias and by two levels when >50% studies yielded high risk of bias

<sup>d</sup>Downgraded for inconsistency by one level for observed heterogeneity ( $I^2=25-75\%$ ) or minimal overlapping confidence intervals ( $P_{\text{heterogeneity}} < 0.10$ ) and two levels for substantial unexplained heterogeneity ( $I^2 > 75\%$ ) or no overlapping confidence intervals

<sup>e</sup>Downgraded for indirectness in population by one level when  $>50\%$  of studies only enrolled severe patients and by two levels when all studies only included severe patients

<sup>f</sup>Downgraded for imprecision due to small number of samples/studies and/or wide confidence intervals

<sup>g</sup>For qualitative summary, results were downgraded for publication bias when the number of samples/studies were relatively small, yielded wide confidence intervals or equivocal estimates.

<sup>h</sup>Upgraded for moderate or large effect size by one level when  $RR > 2$  and by two levels when  $RR > 5$ <sup>55</sup>

<sup>i</sup>Although meta-analysis failed to detect exposure-response gradient, qualitative assessment of eligible studies (i.e. Fadini et al<sup>16</sup> and Zhang et al<sup>49</sup>) indicated significant exposure-response gradient

<sup>j</sup>Although meta-analysis failed to detect exposure-response gradient, qualitative assessment of eligible studies (i.e. Li et al<sup>18</sup>, Zhang et al, Wang et al) indicated significant exposure-response gradient

<sup>k</sup>Not downgraded as publication bias could not be assessed due to insufficient number of studies ( $n < 10$ )<sup>6</sup>

<sup>l</sup>Downgraded for publication bias as funnel plot asymmetry was observed (see Appendix Figure S4; Egger's test:  $p < 0.001$ ; Begg's test:  $p = 0.245$ )

<sup>m</sup>Although considerable heterogeneity was observed ( $I^2 = 78\%$ ,  $p < 0.001$ ), we only downgraded by one level as analysis based on risk of bias explained all heterogeneity.

**Exp-resp grad.**, exposure-response gradient; **GRADE**, the Grading of Recommendations Assessment, Development and Evaluation tool; **ICU**, intensive care unit; **Imprec.**, imprecision; **Inconsist.**, inconsistency; **Indirect.**, indirectness; **k**, number of studies; **Mod-lg ES**, moderate or large effect size; **N**, number of participants; **Phase**, phase of investigation; **Pub. bias**, publication bias; **RR**, risk ratio; **Study limit.**, study limitation.

**Table S7.** Locations of included studies originating from China<sup>a,b</sup>

| Location                                                           | Cai Y <sup>29</sup> | Deng M <sup>32</sup> | Gao S <sup>33</sup> | Han M <sup>35</sup> | Huang R <sup>36</sup> | Li H <sup>18</sup> | Li Y <sup>38</sup> | Liu SP <sup>39</sup> | Long Q <sup>17</sup> | Shi Q <sup>41</sup> | Tu Y <sup>43</sup> | Wang F <sup>44</sup> | Wang S <sup>19</sup> | Wu C <sup>45</sup> | Wu J <sup>46</sup> | Yan Y <sup>47</sup> | Yang J-K <sup>48</sup> | Zhang J <sup>49</sup> | Zhang Q <sup>50</sup> | Zhang Y <sup>20</sup> | Zhang Y(1) <sup>51</sup> | Zhu B <sup>21</sup> | Zhu B(1) <sup>53</sup> |
|--------------------------------------------------------------------|---------------------|----------------------|---------------------|---------------------|-----------------------|--------------------|--------------------|----------------------|----------------------|---------------------|--------------------|----------------------|----------------------|--------------------|--------------------|---------------------|------------------------|-----------------------|-----------------------|-----------------------|--------------------------|---------------------|------------------------|
| China                                                              |                     |                      |                     |                     |                       |                    |                    |                      |                      |                     |                    |                      |                      |                    |                    |                     |                        |                       |                       |                       |                          |                     |                        |
| General Hospital of the Yangtze River Shipping                     |                     |                      |                     |                     |                       |                    |                    |                      |                      |                     |                    |                      |                      |                    |                    |                     |                        |                       |                       |                       |                          |                     |                        |
| Huai'an No. 4 People's Hospital                                    |                     |                      |                     |                     |                       |                    |                    |                      |                      |                     |                    |                      |                      |                    |                    |                     |                        |                       |                       |                       |                          |                     |                        |
| Hubei Provincial Hospital of Integrated Chinese & Western Medicine |                     |                      |                     |                     |                       |                    |                    |                      |                      |                     |                    |                      |                      |                    |                    |                     |                        |                       |                       |                       |                          |                     |                        |
| Hubei Provincial Hospital of Traditional Chinese Medicine          |                     |                      |                     |                     |                       |                    |                    |                      |                      |                     |                    |                      |                      |                    |                    |                     |                        |                       |                       |                       |                          |                     |                        |
| Infectious Disease Hospital of Suqian                              |                     |                      |                     |                     |                       |                    |                    |                      |                      |                     |                    |                      |                      |                    |                    |                     |                        |                       |                       |                       |                          |                     |                        |
| Jin Yin-tan Hospital <sup>c</sup>                                  |                     |                      |                     |                     |                       |                    |                    |                      |                      |                     |                    |                      |                      |                    |                    |                     |                        |                       |                       |                       |                          |                     |                        |
| Renmin Hospital of Wuhan University <sup>c</sup>                   |                     |                      |                     |                     |                       |                    |                    |                      |                      |                     |                    |                      |                      |                    |                    |                     |                        |                       |                       |                       |                          |                     |                        |
| Ruian People's Hospital                                            |                     |                      |                     |                     |                       |                    |                    |                      |                      |                     |                    |                      |                      |                    |                    |                     |                        |                       |                       |                       |                          |                     |                        |
| The Affiliated Hospital of Xuzhou Medical University               |                     |                      |                     |                     |                       |                    |                    |                      |                      |                     |                    |                      |                      |                    |                    |                     |                        |                       |                       |                       |                          |                     |                        |
| The Affiliated Infectious Diseases Hospital of Soochow University  |                     |                      |                     |                     |                       |                    |                    |                      |                      |                     |                    |                      |                      |                    |                    |                     |                        |                       |                       |                       |                          |                     |                        |
| The First Affiliated Hospital of Wenzhou Medical University        |                     |                      |                     |                     |                       |                    |                    |                      |                      |                     |                    |                      |                      |                    |                    |                     |                        |                       |                       |                       |                          |                     |                        |
| The First People's Hospital of Lianyungang                         |                     |                      |                     |                     |                       |                    |                    |                      |                      |                     |                    |                      |                      |                    |                    |                     |                        |                       |                       |                       |                          |                     |                        |
| The Second Affiliated Hospital of Wenzhou Medical University       |                     |                      |                     |                     |                       |                    |                    |                      |                      |                     |                    |                      |                      |                    |                    |                     |                        |                       |                       |                       |                          |                     |                        |
| The Third People's Hospital of Changzhou                           |                     |                      |                     |                     |                       |                    |                    |                      |                      |                     |                    |                      |                      |                    |                    |                     |                        |                       |                       |                       |                          |                     |                        |

|                                                    |  |  |  |  |  |  |  |  |  |  |  |  |  |  |  |  |  |  |  |  |  |  |  |  |  |  |  |  |  |
|----------------------------------------------------|--|--|--|--|--|--|--|--|--|--|--|--|--|--|--|--|--|--|--|--|--|--|--|--|--|--|--|--|--|
| The Third People's Hospital of Yangzhou            |  |  |  |  |  |  |  |  |  |  |  |  |  |  |  |  |  |  |  |  |  |  |  |  |  |  |  |  |  |
| Tongji Hospital <sup>c</sup>                       |  |  |  |  |  |  |  |  |  |  |  |  |  |  |  |  |  |  |  |  |  |  |  |  |  |  |  |  |  |
| Wenzhou Central Hospital                           |  |  |  |  |  |  |  |  |  |  |  |  |  |  |  |  |  |  |  |  |  |  |  |  |  |  |  |  |  |
| Wenzhou Sixth People's Hospital                    |  |  |  |  |  |  |  |  |  |  |  |  |  |  |  |  |  |  |  |  |  |  |  |  |  |  |  |  |  |
| Wuhan Fifth Hospital                               |  |  |  |  |  |  |  |  |  |  |  |  |  |  |  |  |  |  |  |  |  |  |  |  |  |  |  |  |  |
| Wuhan Third Hospital <sup>c</sup>                  |  |  |  |  |  |  |  |  |  |  |  |  |  |  |  |  |  |  |  |  |  |  |  |  |  |  |  |  |  |
| Wuhan Hankou Hospital <sup>c</sup>                 |  |  |  |  |  |  |  |  |  |  |  |  |  |  |  |  |  |  |  |  |  |  |  |  |  |  |  |  |  |
| Wuhan Red Cross Hospital                           |  |  |  |  |  |  |  |  |  |  |  |  |  |  |  |  |  |  |  |  |  |  |  |  |  |  |  |  |  |
| Wuhan Sixth Hospital                               |  |  |  |  |  |  |  |  |  |  |  |  |  |  |  |  |  |  |  |  |  |  |  |  |  |  |  |  |  |
| Wuhan Union Hospital <sup>d</sup>                  |  |  |  |  |  |  |  |  |  |  |  |  |  |  |  |  |  |  |  |  |  |  |  |  |  |  |  |  |  |
| Wuhan Wuchang Hospital                             |  |  |  |  |  |  |  |  |  |  |  |  |  |  |  |  |  |  |  |  |  |  |  |  |  |  |  |  |  |
| Yancheng Second People's Hospital                  |  |  |  |  |  |  |  |  |  |  |  |  |  |  |  |  |  |  |  |  |  |  |  |  |  |  |  |  |  |
| Zhongnan Hospital of Wuhan University <sup>c</sup> |  |  |  |  |  |  |  |  |  |  |  |  |  |  |  |  |  |  |  |  |  |  |  |  |  |  |  |  |  |

<sup>a</sup>Overlapping populations were determined from: (1) study location, (2) recruitment period (see Table SX), and (3) co-overlapping authors<sup>9</sup>.

<sup>b</sup>Studies originating from outside China was not shown as no potential overlapping populations were detected. <sup>c</sup>No overlapping populations were detected as we did not observe any overlapping co-authors. <sup>d</sup>Possible overlapping populations were observed between Li et al<sup>18</sup>, Wang et al<sup>19</sup>, Zhang et al<sup>20</sup>, and Zhu et al<sup>21</sup> (as confirmed by the authors).



**Figure S2.** Leave-one-out sensitivity analysis of high vs low meta-analysis between admission fasting blood glucose and outcomes on (A) poor outcome, (B) mortality and (C) severity. Solid vertical lines refer to the pooled overall estimates, while dashed vertical lines refer to the 95% confidence interval of the estimates.

**(A) Fasting blood glucose: Poor outcome**

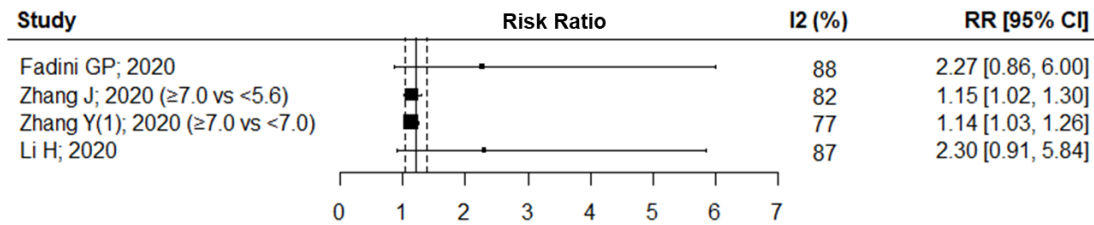

**(B) Fasting blood glucose: Mortality**

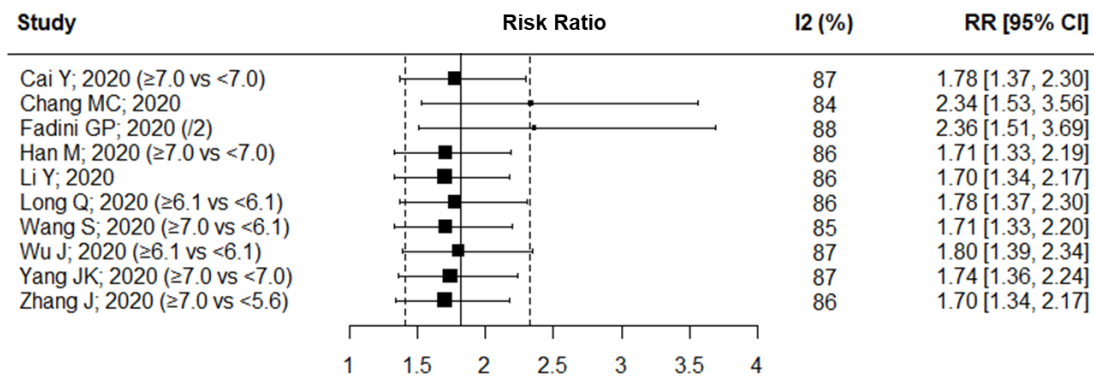

**(C) Fasting blood glucose: Severity**

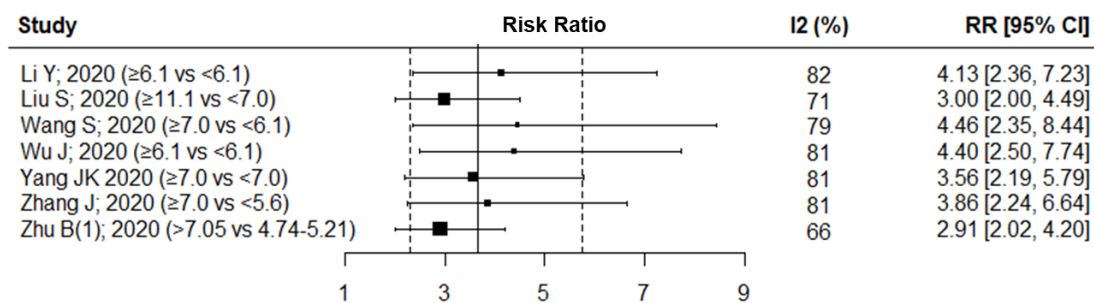

**Figure S3.** Contour-enhanced funnel plot with pseudo 95% confidence interval indicating evidence of publication bias (as shown by asymmetry) for high vs low meta-analysis evaluating admission fasting blood glucose level and mortality in COVID-19 patients

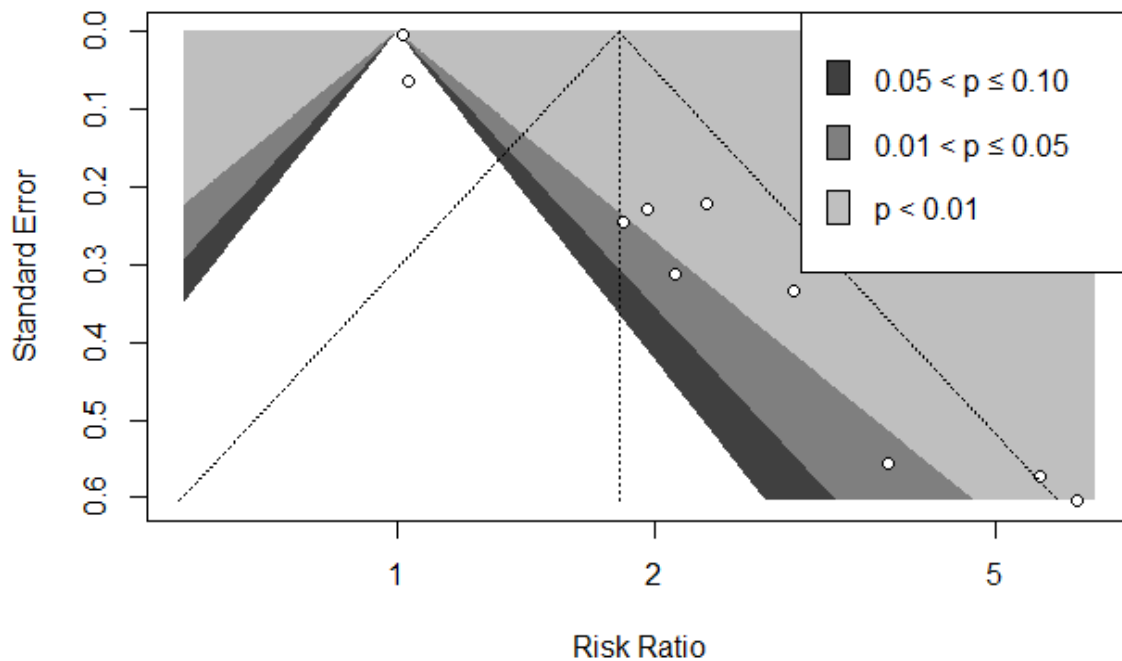

**Figure S4.** Linear dose-response relationship between admission FBG level and mortality in non-diabetic COVID-19 patients. FBG, fasting blood glucose

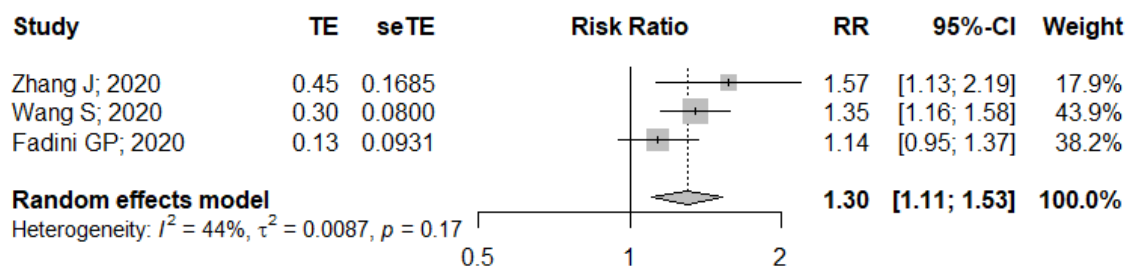

**Table S8.** Outcomes on the association of admission fasting blood glucose and prognosis of COVID-19 patients

| Author; Year                  | Outcome               | Adjusted variables                                                                                               | Risk ratio (95% CI) <sup>a</sup> |                                |                               |
|-------------------------------|-----------------------|------------------------------------------------------------------------------------------------------------------|----------------------------------|--------------------------------|-------------------------------|
|                               |                       |                                                                                                                  | Cut-off (mmol/L)                 | Unadjusted                     | Adjusted                      |
| <b>Poor composite outcome</b> |                       |                                                                                                                  |                                  |                                |                               |
| Fadini PG; 2020               | ICU, IV, or Death     | Age, Sex, Clinical (CKD, Steroid)                                                                                | +2                               | 1.21 (1.11-1.32)               | 1.15 (1.07-1.23)              |
| Li H; 2020                    | Severity, or Death    | Age, Sex                                                                                                         | 7.0                              | 1.34 (1.20-1.50) <sup>b</sup>  | 1.09 (1.06-1.13) <sup>c</sup> |
| Zhang J; 2020                 | ICU, IV, or Death     | Age, Sex, Hospital, Clinical (Comorbidities)                                                                     | ≥7.0 vs <5.6                     | 5.70 (2.80-11.63) <sup>b</sup> | 3.53 (1.48-8.41) <sup>d</sup> |
|                               |                       |                                                                                                                  | 5.6-6.9 vs <5.6                  | 3.27 (1.43-7.51) <sup>b</sup>  | 1.42 (0.53-3.81) <sup>d</sup> |
| Zhang Y(1); 2020              | ICU, IV, or Death     | Age, Sex, Clinical (BMI, Cancer, CVD, Hypertension)                                                              | 7.0                              | 2.75 (1.11-6.81) <sup>b</sup>  | 3.70 (1.73-7.93) <sup>d</sup> |
| <b>Mortality</b>              |                       |                                                                                                                  |                                  |                                |                               |
| Cai Y; 2020                   | In-hospital mortality | Age, Clinical (ARDS, CKD, COPD, CVD, Diabetes, Hypertension), Laboratory (Creatinine, CRP, Leukocyte count, PCT) | 7.0                              | 3.15 (2.17-4.56) <sup>d</sup>  | 2.11 (1.15-3.88) <sup>d</sup> |
| Chang MC; 2020                |                       | Age, Clinical (CLD, Diabetes), Laboratory (WBC)                                                                  | NR                               |                                | 1.01 (1.00-1.02) <sup>d</sup> |
| Fadini PG; 2020               |                       | Age, Sex                                                                                                         | +2                               | 1.15 (1.03-1.30)               | 1.03 (0.91-1.16) <sup>c</sup> |
| Gao S; 2020                   |                       |                                                                                                                  | ≥6.1 vs <3.9                     | 0.72 (0.06-9.34) <sup>b</sup>  |                               |
|                               |                       |                                                                                                                  | 3.9-6.1 vs <3.9                  | 0.56 (0.04-7.41) <sup>b</sup>  |                               |
| Han M; 2020                   | Hospitalized death    | Age, Clinical (SOFA score), Laboratory (D-dimer, Lymphocyte)                                                     | 7.0                              |                                | 2.90 (1.51-5.58) <sup>e</sup> |
|                               |                       |                                                                                                                  | ≥11.1 vs <7.0                    | 5.04 (3.03-8.38) <sup>b</sup>  |                               |

|                |                       |                                                                                                                                                               |                  |                                                                            |                                |
|----------------|-----------------------|---------------------------------------------------------------------------------------------------------------------------------------------------------------|------------------|----------------------------------------------------------------------------|--------------------------------|
|                |                       |                                                                                                                                                               | 7.0-11.1 vs <7.0 | 2.44 (1.34-4.44) <sup>b</sup>                                              |                                |
| Li H; 2020     | All-cause mortality   | Age, Sex, Smoking, Clinical (SBP), Laboratory (Total cholesterol)                                                                                             | ≥7.0 vs <5.6     | 14.04 (3.36-58.64) <sup>b</sup>                                            | 9.43 (2.18-40.6) <sup>d</sup>  |
|                |                       |                                                                                                                                                               | 5.6-6.9 vs <5.6  | 3.07 (0.63-14.93) <sup>b</sup>                                             | 2.84 (0.57-14.1) <sup>d</sup>  |
| Li Y; 2020     | In-hospital mortality | Laboratory (D-dimer)                                                                                                                                          | 11.0             | 3.73 (1.30-8.53) <sup>b</sup>                                              | 5.66 (1.84-17.39) <sup>e</sup> |
| Long Q; 2020   | In-hospital mortality | Age, Laboratory (BUN)                                                                                                                                         | 6.1              | 1.76 (1.48-2.05) <sup>e</sup>                                              | 1.96 (1.25-3.07) <sup>c</sup>  |
| Shi Q; 2020    | In-hospital mortality |                                                                                                                                                               | NR               | DM: 1.12 (1.05-1.19) <sup>d</sup><br>Non-DM: 1.13 (1.02-1.25) <sup>d</sup> |                                |
| Wang S; 2020   | 28-day mortality      | Age, Sex, Clinical (CRB-65 score)                                                                                                                             | ≥7.0 vs <6.1     | 3.54 (2.33-5.38) <sup>d</sup>                                              | 2.30 (1.49-3.55) <sup>d</sup>  |
|                |                       |                                                                                                                                                               | 6.1-6.9 vs <6.1  | 1.71 (0.99-2.94) <sup>d</sup>                                              | 2.06 (1.20-3.54) <sup>d</sup>  |
| Wu C; 2020     |                       |                                                                                                                                                               | NR               | 1.00 (0.92-1.08) <sup>d</sup>                                              |                                |
| Wu J; 2020     | In-hospital mortality | Age, Sex, Smoking, Clinical (Cancer, CKD, COPD, Corticosteroid, Diabetes, Hypertension, Insulin), Laboratory (ALT, AST, Creatinine, D-dimer, Lymphocyte, WBC) | 6.1              | 2.21 (1.43, 3.43) <sup>d</sup>                                             | 1.84 (1.14-2.97) <sup>d</sup>  |
| Yang J-K; 2020 | In-hospital mortality | Sex                                                                                                                                                           | 7.0              | 5.10 (1.77-14.7) <sup>d</sup>                                              | 3.75 (1.26-11.16) <sup>d</sup> |
| Zhang J; 2020  |                       | Age, Sex, Hospital, Clinical (Comorbidities)                                                                                                                  | ≥7.0 vs <5.6     | 9.88 (3.49-27.98) <sup>b</sup>                                             | 6.25 (1.91-20.45) <sup>d</sup> |
|                |                       |                                                                                                                                                               | 5.6-6.9 vs <5.6  | 6.02 (1.92-18.86) <sup>b</sup>                                             | 4.11 (1.15-14.74) <sup>d</sup> |
| Zhang Y; 2020  |                       | Age, Clinical (CKD, CVD), Laboratory (CRP, Eosinophil, Leukocytes, Lymphocyte,                                                                                | 6.1              |                                                                            | 1.19 (1.08-1.31) <sup>d</sup>  |

|                  |                 |                                                                                       |                               |                                  |                                |
|------------------|-----------------|---------------------------------------------------------------------------------------|-------------------------------|----------------------------------|--------------------------------|
|                  |                 | Neutrophil-to-lymphocyte ratio, Neutrophils, PCT)                                     |                               |                                  |                                |
| Zhang Y(1); 2020 |                 |                                                                                       | 7.0                           | 1.50 (0.44-5.17) <sup>e</sup>    |                                |
| Zhu B; 2020      |                 | Age, Sex, Clinical (BMI, DBP, SBP), Laboratory (HDL, Total cholesterol, Triglyceride) | 7.0                           | 2.65 (0.99-7.12) <sup>f</sup>    | 3.53 (0.59-21.15) <sup>d</sup> |
| <b>Severity</b>  |                 |                                                                                       |                               |                                  |                                |
| Deng M; 2020     | Severe/Critical |                                                                                       | 6.1                           | 6.13 (2.53-9.26) <sup>e</sup>    |                                |
| Li H; 2020       | Severe/Critical | Age, Sex                                                                              | 7.0                           |                                  | 1.09 (1.06-1.12) <sup>c</sup>  |
|                  |                 | $\geq 7.0$ vs<br><5.6                                                                 | 1.46 (1.25-1.70) <sup>b</sup> |                                  |                                |
|                  |                 |                                                                                       | 5.6-6.9 vs<br><5.6            | 1.17 (0.99-1.40) <sup>b</sup>    |                                |
|                  | ICU             |                                                                                       | $\geq 7.0$ vs<br><5.6         | 7.72 (1.75-34.04) <sup>b</sup>   |                                |
|                  |                 |                                                                                       | 5.6-6.9 vs<br><5.6            | 4.09 (0.89-18.91) <sup>b</sup>   |                                |
|                  | IV              |                                                                                       | $\geq 7.0$ vs<br><5.6         | 5.14 (1.48-17.95) <sup>b</sup>   |                                |
|                  |                 |                                                                                       | 5.6-6.9 vs<br><5.6            | 2.05 (0.52-8.01) <sup>b</sup>    |                                |
|                  | Shock           |                                                                                       | $\geq 7.0$ vs<br><5.6         | 10.30 (3.17-33.41) <sup>b</sup>  |                                |
|                  |                 |                                                                                       | 5.6-6.9 vs<br><5.6            | 2.05 (0.52-8.01) <sup>b</sup>    |                                |
|                  | ARDS            |                                                                                       | $\geq 7.0$ vs<br><5.6         | 14.04 (1.83-107.84) <sup>b</sup> |                                |
|                  |                 |                                                                                       | 5.6-6.9 vs<br><5.6            | 4.09 (0.46-36.13) <sup>b</sup>   |                                |

|                |                                        |                                                                                                                                                                         |                                                                                                         |                                  |                                  |
|----------------|----------------------------------------|-------------------------------------------------------------------------------------------------------------------------------------------------------------------------|---------------------------------------------------------------------------------------------------------|----------------------------------|----------------------------------|
| Li Y; 2020     | In-hospital complication               | Imaging (HRCT score)                                                                                                                                                    | 6.1                                                                                                     | 1.26 (0.33-4.78)                 | 2.44 (1.43-4.18) <sup>e</sup>    |
|                | ICU                                    |                                                                                                                                                                         | 11.0                                                                                                    | 2.33 (0.98-5.53) <sup>b</sup>    |                                  |
|                | IV                                     |                                                                                                                                                                         | 11.0                                                                                                    | 2.04 (0.35-11.78) <sup>b</sup>   |                                  |
|                | ARDS                                   |                                                                                                                                                                         | 11.0                                                                                                    | 2.52 (1.08-5.91) <sup>b</sup>    |                                  |
| Liu S; 2020    | ICU                                    | Age, Sex, Duration of illness, Clinical (Diabetes), Laboratory (D-dimer, IL-6)                                                                                          | ≥11.1 vs <7.0                                                                                           | 24.22 (11.42-51.41) <sup>d</sup> | 11.55 (4.45-29.98) <sup>d</sup>  |
|                |                                        |                                                                                                                                                                         | 7.0-11.1 vs <7.0                                                                                        | 8.45 (4.050-17.63) <sup>d</sup>  | 5.54 (2.23-13.51) <sup>d</sup>   |
|                |                                        |                                                                                                                                                                         | NR                                                                                                      |                                  | 1.56 (1.29-1.88) <sup>d</sup>    |
| Long Q; 2020   | IV                                     |                                                                                                                                                                         | 6.1                                                                                                     | 1.96 (1.31-2.79) <sup>c</sup>    |                                  |
| Smith SM; 2020 | IV                                     |                                                                                                                                                                         | ↑FBG between intubated vs non-intubated patients (MD: 74.3 mmol/L [95% CI: 9.02-135.9 mmol/L], p=0.013) |                                  |                                  |
| Wang S; 2020   | In-hospital complication               |                                                                                                                                                                         | ≥7.0 vs <5.6                                                                                            | 2.24 (1.80-2.79) <sup>b</sup>    | 2.24 (1.91-2.63) <sup>e</sup>    |
|                |                                        |                                                                                                                                                                         | 5.6-6.9 vs <5.6                                                                                         | 1.84 (1.40-2.41) <sup>b</sup>    | 1.84 (1.41-2.33) <sup>e</sup>    |
| Wu C; 2020     | ARDS                                   |                                                                                                                                                                         | NR                                                                                                      | 1.13 (1.08-1.19) <sup>d</sup>    |                                  |
| Wu J; 2020     | Critical (IV, Shock, or ICU admission) | Age, Sex, Smoking, Clinical (Cancer, CKD, COPD, Diabetes, Hypertension, Insulin, Systemic glucocorticoids), Laboratory (ALT, AST, Creatinine, D-dimer, Lymphocyte, WBC) | 6.1                                                                                                     | 2.08 (1.69-2.56) <sup>d</sup>    | 1.84 (1.14 to 2.97) <sup>d</sup> |
| Yang J-K; 2020 | Critical (IV, Shock, or ICU)           | Laboratory (HBDH)                                                                                                                                                       | 7.0                                                                                                     | 2.97 (1.09-8.11) <sup>e</sup>    | 4.82 (1.18-11.06) <sup>e</sup>   |
| Zhang J; 2020  | In-hospital complication               | Age, Sex, Hospital, Clinical (Comorbidities)                                                                                                                            | ≥7.0 vs <5.6                                                                                            | 3.50 (1.87-6.55) <sup>b</sup>    | 3.26 (1.85-5.75) <sup>e</sup>    |
|                |                                        |                                                                                                                                                                         | 5.6-6.9 vs <5.6                                                                                         | 2.27 (1.07-4.79) <sup>b</sup>    | 2.50 (1.17-4.69) <sup>e</sup>    |

|                     |                 |                                                      |                          |                                  |                                 |
|---------------------|-----------------|------------------------------------------------------|--------------------------|----------------------------------|---------------------------------|
|                     | ICU             |                                                      | $\geq 7.0$ vs $< 5.6$    | 2.63 (0.60-11.50) <sup>b</sup>   |                                 |
|                     |                 |                                                      | 5.6-6.9 vs $< 5.6$       | 1.76 (0.31-10.43) <sup>b</sup>   |                                 |
|                     | IV              |                                                      | $\geq 7.0$ vs $< 5.6$    | 2.96 (0.50-17.40) <sup>b</sup>   | 6.33 (1.87-21.48) <sup>e</sup>  |
|                     |                 |                                                      | 5.6-6.9 vs $< 5.6$       | 2.68 (0.39-18.60) <sup>b</sup>   | 1.66 (0.42-6.54) <sup>e</sup>   |
|                     | Shock           |                                                      | $\geq 7.0$ vs $< 5.6$    | 9.88 (2.94-33.19) <sup>b</sup>   |                                 |
|                     |                 |                                                      | 5.6-6.9 vs $< 5.6$       | 4.46 (1.10-18.12) <sup>b</sup>   |                                 |
|                     | ARDS            |                                                      | $\geq 7.0$ vs $< 5.6$    | 4.61 (1.22-17.38) <sup>b</sup>   |                                 |
|                     |                 |                                                      | 5.6-6.9 vs $< 5.6$       | 1.78 (0.31-10.43) <sup>b</sup>   |                                 |
| Zhang Y(1);<br>2020 | Severe/Critical |                                                      | 7.0                      | 1.19 (0.97-1.29) <sup>b</sup>    |                                 |
|                     | ICU             |                                                      | 7.0                      | 6.15 (0.76-49.94) <sup>b</sup>   |                                 |
|                     | IV              |                                                      | 7.0                      | 10.24 (1.34-78.23) <sup>b</sup>  |                                 |
| Zhu B(1); 2020      | Severe/Critical | Age, Sex, Clinical (BMI), Laboratory (AST, HDL, LDH) | $\geq 7.05$ vs 4.74-5.21 | 40.35 (12.53-51.29) <sup>e</sup> | 23.85 (6.77-84.07) <sup>e</sup> |
|                     |                 |                                                      | 5.78-7.05 vs 4.74-5.21   | 16.27 (2.72-44.67) <sup>e</sup>  | 9.13 (1.23-36.44) <sup>e</sup>  |
|                     |                 |                                                      | 5.21-5.78 vs 4.74-5.21   | 8.42 (1.16-34.48) <sup>e</sup>   | 3.03 (0.33-20.08) <sup>e</sup>  |
|                     |                 |                                                      | $< 4.74$ vs 4.74-5.21    | 12.41 (1.90-40.52) <sup>e</sup>  | 18.02 (2.69-47.82) <sup>e</sup> |

<sup>a</sup>Unless explicitly stated, all outcomes are presented in rate ratios along with their 95% CIs. <sup>b</sup>Calculated from binary data<sup>3</sup>; <sup>c</sup>Unpublished data, provided by request. <sup>d</sup>Outcomes were originally reported as hazard ratios, but we were unable to approximate the optimal minimax conversion

for the risk ratios as the outcome probability in either or both groups fell beyond the range (i.e. <20 or >80%)<sup>7</sup>; therefore, we decided to use the effect sizes interchangeably and explored the potential disparities by subgroup analyses. <sup>e</sup>Calculated using the formula provided by Cochrane handbook<sup>6</sup>; <sup>f</sup>Calculated using the formula provided by VanderWeele et al<sup>7</sup>.

**ALT**, alanine aminotransferase; **ARDS**, acute respiratory distress syndrome; **AST**, aspartate aminotransferase; **BMI**, body mass index; **BUN**, blood urea nitrogen; **CCB**, calcium channel blocker; **CKD**, chronic kidney disease; **CI**, confidence interval; **CLD**, chronic lung disease; **COPD**, chronic obstructive pulmonary disease; **CRB-65 score**, confusion-respiratory rate-blood pressure-65 score; **CRP**, C-reactive protein; **CT**, computed tomography; **CVD**, cardiovascular disease; **DBP**, diastolic blood pressure; **eGFR**, estimated glomerular filtration rate; **HBDH**,  $\alpha$ -hydroxybutyrate dehydrogenase; **HDL**, high-density lipoprotein; **HRCT**, high-resolution computed tomography; **ICU**, intensive care unit; **IL-6**, interleukin 6; **IV**, invasive ventilation; **LDH**, lactate dehydrogenase; **LDL**, low-density lipoprotein; **MLR**, monocyte-to-lymphocyte ratio; **NLR**, neutrophil-to-lymphocyte ratio; **PCT**, procalcitonin; **SBP**, systolic blood pressure; **SOFA score**, sequential organ failure assessment score; **TG**, triglyceride; **WBC**, white blood cells.



**Table S9.** Sensitivity analysis for linear dose-response meta-analysis on the association between admission fasting blood glucose concentration and mortality and severity in COVID-19 patients

|                              | <b>Lower open-ended category</b>      | <b>Upper open-ended category</b>      | <b>RR (95% CI) per 1 mmol/L increase</b> |
|------------------------------|---------------------------------------|---------------------------------------|------------------------------------------|
| <b>Mortality<sup>a</sup></b> |                                       |                                       |                                          |
| Primary analysis             | Midpoint between UB and 3.9 mmol/L    | LB + 1.5 x width of adjacent category | 1.25 (0.96-1.63)                         |
| Non-diabetic patients        |                                       |                                       | 1.30 (1.11-1.53)                         |
| <b>Severity</b>              |                                       |                                       |                                          |
| Primary analysis             | Midpoint between UB and 3.9 mmol/L    | LB + 1.5 x width of adjacent category | 1.33 (1.26-1.40)                         |
| Non-diabetic patients        |                                       |                                       | 1.36 (1.28-1.44)                         |
| Model 1                      | Midpoint between UB and 3.9 mmol/L    | 25% higher than LB                    | 1.25 (1.20-1.29)                         |
| Model 2                      | Midpoint between UB and 3.9 mmol/L    | 50% higher than LB                    | 1.17 (1.12-1.21)                         |
| Model 3                      | Midpoint between UB and 3.9 mmol/L    | LB + 0.5 x width of adjacent category | 1.41 (1.33-1.49)                         |
| Model 4                      | Midpoint between UB and 3.9 mmol/L    | LB + 1.0 x width of adjacent category | 1.37 (1.29-1.44)                         |
| Model 5                      | Midpoint between UB and 3.9 mmol/L    | LB + 2.0 x width of adjacent category | 1.29 (1.21-1.38)                         |
| Model 6                      | UB - 0.5 x width of adjacent category | 25% higher than LB                    | 1.30 (1.24-1.36)                         |
| Model 7                      | UB - 0.5 x width of adjacent category | 50% higher than LB                    | 1.18 (1.14-1.21)                         |
| Model 8                      | UB - 0.5 x width of adjacent category | LB + 0.5 x width of adjacent category | 1.51 (1.22-1.86)                         |
| Model 9                      | UB - 0.5 x width of adjacent category | LB + 1.0 x width of adjacent category | 1.43 (1.21-1.70)                         |
| Model 10                     | UB - 0.5 x width of adjacent category | LB + 1.5 x width of adjacent category | 1.38 (1.19-1.60)                         |
| Model 11                     | UB - 0.5 x width of adjacent category | LB + 2.0 x width of adjacent category | 1.34 (1.17-1.53)                         |
| Model 12                     | UB - 1.0 x width of adjacent category | 25% higher than LB                    | 1.28 (1.23-1.34)                         |
| Model 13                     | UB - 1.0 x width of adjacent category | 50% higher than LB                    | 1.17 (1.14-1.21)                         |
| Model 14                     | UB - 1.0 x width of adjacent category | LB + 0.5 x width of adjacent category | 1.46 (1.24-1.73)                         |
| Model 15                     | UB - 1.0 x width of adjacent category | LB + 1.0 x width of adjacent category | 1.40 (1.22-1.62)                         |
| Model 16                     | UB - 1.0 x width of adjacent category | LB + 1.5 x width of adjacent category | 1.36 (1.20-1.54)                         |

|          |                                       |                                       |                  |
|----------|---------------------------------------|---------------------------------------|------------------|
| Model 17 | UB - 1.0 x width of adjacent category | LB + 2.0 x width of adjacent category | 1.33 (1.18-1.49) |
|----------|---------------------------------------|---------------------------------------|------------------|

<sup>a</sup>Sensitivity analysis for mortality outcome was not conducted as the primary outcome failed to exhibit exposure-response gradient

**Figure S5.** Sensitivity analysis for non-linear dose-response meta-analysis of severity outcome according to location of knots

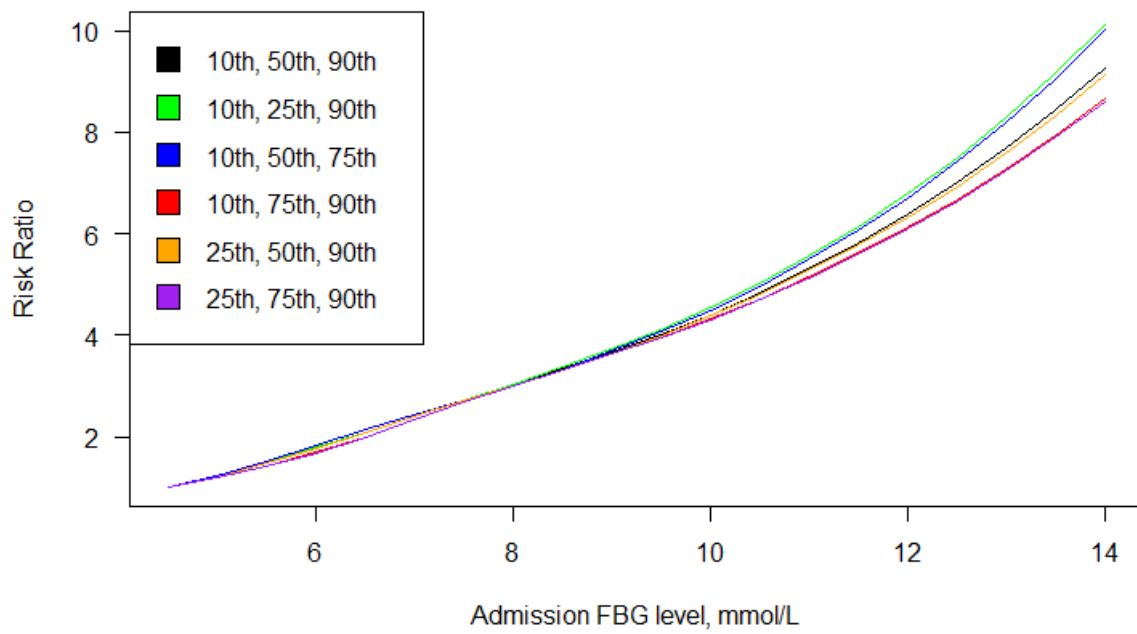

**Table S10.** Outcomes on the association of admission random blood glucose and prognosis of COVID-19 patients

| Author; Year                  | Outcome               | Adjusted variables                                                                                                                                                                                 | Risk ratio (95% CI) <sup>a</sup> |                                  |                               |
|-------------------------------|-----------------------|----------------------------------------------------------------------------------------------------------------------------------------------------------------------------------------------------|----------------------------------|----------------------------------|-------------------------------|
|                               |                       |                                                                                                                                                                                                    | Cut-off (mmol/L)                 | Unadjusted                       | Adjusted                      |
| <b>Poor composite outcome</b> |                       |                                                                                                                                                                                                    |                                  |                                  |                               |
| Cariou B; 2020                | IV or death           | Age, Sex, Clinical (BMI, Dyspnea), Laboratory (AST, CRP, eGFR, Lymphocyte, Platelet)                                                                                                               | +1SD                             | OR 1.28 (1.12-1.24)              | OR 1.14 (0.92-1.42)           |
| Sardu C; 2020                 | ICU, IV, or Death     | Age, Sex, Smoking, Clinical (ACEI, Aspirin, $\beta$ -blocker, Blood pressure, BMI, CCB, CVD, Dyslipidemia, Heart rate, Hypertension, Thiazide diuretics), Laboratories (Cholesterol, HDL, LDL, TG) | 7.7                              | RR 3.54 (1.45-8.64) <sup>b</sup> | HR 3.51 (1.04-11.90)          |
| <b>Mortality</b>              |                       |                                                                                                                                                                                                    |                                  |                                  |                               |
| Bode B; 2020                  | In-hospital mortality |                                                                                                                                                                                                    | 10.0                             | 4.63 (2.96-7.26) <sup>b</sup>    |                               |
| Cariou B; 2020                | 7-day mortality       | Age, Sex, Clinical (Ageusia, Cephalalgia, Dyspnea, Rhinitis), Laboratory (AST, CRP, eGFR, Platelet, WBC)                                                                                           | +1SD                             | OR 1.20 (0.98-1.46)              | OR 1.30 (0.94-1.82)           |
| Coppelli A; 2020              |                       | Age, Sex, Clinical (CKD, Cognitive impairments, COPD, Hypertension, Stroke), Laboratory (D-dimer, Lymphocyte)                                                                                      | >7.84 vs <7.78                   | 2.19 (1.27-3.81) <sup>c</sup>    | 2.39 (1.10-5.19) <sup>c</sup> |
|                               |                       |                                                                                                                                                                                                    | Q5 vs Q1                         | HR 2.32 (0.91-5.96)              | HR 1.70 (0.49-5.90)           |
|                               |                       |                                                                                                                                                                                                    | Q4 vs Q1                         | HR 3.57 (1.46-8.76)              | HR 5.91 (1.73-20.19)          |
|                               |                       |                                                                                                                                                                                                    | Q3 vs Q1                         | HR 1.83 (0.69-4.88)              | HR 3.87 (1.04-14.43)          |
|                               |                       |                                                                                                                                                                                                    | Q2 vs Q1                         | HR 1.37 (0.49-3.85)              | HR 1.50 (0.37-5.08)           |
| Han M; 2020                   | Hospitalized death    | Age, Clinical (SOFA score), Laboratory (D-dimer, Lymphocyte)                                                                                                                                       | $\geq 11.1$ vs <7.0              | 2.84 (1.76-4.56) <sup>b</sup>    |                               |

|                         |         |                                                                                                                                           |                     |                                |                               |
|-------------------------|---------|-------------------------------------------------------------------------------------------------------------------------------------------|---------------------|--------------------------------|-------------------------------|
|                         |         |                                                                                                                                           | 7.0-11.1 vs<br><7.0 | 1.49 (0.89-2.47) <sup>b</sup>  |                               |
| Sardu C; 2020           |         |                                                                                                                                           | 7.7                 | 6.80 (0.85-54.65) <sup>b</sup> |                               |
| <b>Severity</b>         |         |                                                                                                                                           |                     |                                |                               |
| Coppelli A;<br>2020     | ICU     |                                                                                                                                           | 7.78                | 1.88 (1.28-2.77) <sup>b</sup>  |                               |
|                         | IV      |                                                                                                                                           | 7.78                | 2.92 (1.66-5.13) <sup>b</sup>  |                               |
|                         | ARDS    |                                                                                                                                           | 7.78                | 1.80 (1.32-2.44) <sup>b</sup>  |                               |
| Iacobellis G;<br>2020   | ARDS    | Age, Sex, Temperature                                                                                                                     |                     |                                | $\beta$ 0.912 (0.91-0.92)     |
| Mejía-Vilet<br>JM; 2020 | ICU     | Sex, Clinical (Charlson comorbidity index, Dyspnea, Respiratory rate, SBP), Laboratory (Albumin, LDH, S/F ratio), Imaging (Lung CT value) | 11.1                | 1.65 (1.30-1.93) <sup>d</sup>  | 1.57 (1.16-2.11) <sup>d</sup> |
| Sardu C; 2020           | ICU, IV |                                                                                                                                           | 7.7                 | 2.72 (0.92-8.04) <sup>b</sup>  |                               |
|                         | ICU     |                                                                                                                                           | 7.7                 | 4.08 (0.45-36.95) <sup>b</sup> |                               |
|                         | IV      |                                                                                                                                           | 7.7                 | 3.40 (1.20-9.60) <sup>b</sup>  |                               |
| Tu Y; 2020 <sup>d</sup> | IV      | Age, Laboratory (D-dimer, LDH, MLR, WBC)                                                                                                  |                     | $\beta$ -0.33 (-0.58, -0.08)   | $\beta$ -0.27 (-0.49, -0.05)  |
| Zhou J; 2020            | ICU     | Age, Sex, Residence districts, Clinical (Comorbidities)                                                                                   | NR                  |                                | 1.05 (1.04-1.06) <sup>d</sup> |

<sup>a</sup>Unless explicitly stated, all outcomes are presented in rate ratios along with their 95% CIs. <sup>b</sup>Calculated from binary data<sup>3</sup>. <sup>c</sup>Outcomes were originally reported as hazard ratios, but we were unable to approximate the optimal minimax conversion for the risk ratios as the outcome probability in either or both groups fell beyond the range (i.e. <20 or >80%)<sup>7</sup>; therefore, we decided to use the effect sizes interchangeably and explored the potential disparities by subgroup analyses. <sup>d</sup>Calculated using the formula provided by Cochrane handbook<sup>6</sup>; <sup>e</sup>Calculated using the formula provided by VanderWeele et al<sup>7</sup>.

**ACEI**, angiotensin-converting-enzyme inhibitor; **ARDS**, acute respiratory distress syndrome; **AST**, aspartate aminotransferase; **BMI**, body mass index; **CCB**, calcium channel blocker; **CI**, confidence interval; **CKD**, chronic kidney disease; **CRP**, C-reactive protein; **CT**, computed tomography; **CVD**, cardiovascular disease; **eGFR**, estimated glomerular filtration rate; **HDL**, high-density lipoprotein; **ICU**, intensive care unit;

**IV**, invasive ventilation; **LDH**, lactate dehydrogenase; **LDL**, low-density lipoprotein; **S/F ratio**, SpO<sub>2</sub>/FiO<sub>2</sub> ratio; **SBP**, systolic blood pressure; **SOFA score**, sequential organ failure assessment score; **TG**, triglyceride; **β-blocker**, beta-blocker

## Supplementary References

1. Riley RD, Moons KGM, Snell KIE, Ensor J, Hooft L, Altman DG, et al. A guide to systematic review and meta-analysis of prognostic factor studies. *BMJ*. 2019;364.
2. Tierney JF, Stewart LA, Ghersi D, Burdett S, Sydes MR. Practical methods for incorporating summary time-to-event data into meta-analysis. *Trials*. 2007 Jun 7;8:16.
3. Viera AJ. Odds ratios and risk ratios: what's the difference and why does it matter? *South Med J*. 2008 Jul;101(7):730–4.
4. Hayden JA, Côté P, Bombardier C. Evaluation of the quality of prognosis studies in systematic reviews. *Ann Intern Med*. 2006 Mar 21;144(6):427–37.
5. Kumaravel B, Bachmann MO, Murray N, Dhatariya K, Fenech M, John WG, et al. Use of haemoglobin A1c to detect impaired fasting glucose or Type 2 diabetes in a United Kingdom community based population. *Diabetes Res Clin Pract*. 2012;96:211–6.
6. Higgins J, Thomas J, Chandler J, Cumpston M, Li T, Page M, et al., editors. *Cochrane handbook for systematic reviews of interventions version 6.0 (updated July 2019)*. 6th ed. Cochrane Handbook for Systematic Reviews of Interventions. Cochrane; 2019.
7. VanderWeele TJ. Optimal approximate conversions of odds ratios and hazard ratios to risk ratios. *Biometrics*. 2019;1–7.
8. Higgins JPT, Thompson SG, Deeks JJ, Altman DG. Measuring inconsistency in meta-analyses. *BMJ*. 2003 Sep 6;327(7414):557–60.
9. Wood J. Methodology for dealing with duplicate study effects in a meta-analysis. *Organ Res Methods*. 2008;11(1):79–95.
10. Liao WC, Tu YK, Wu MS, Lin JT, Wang HP, Chien KL. Blood glucose concentration and risk of pancreatic cancer: Systematic review and dose-response meta-analysis. *BMJ*. 2015;349:g7371.
11. Orsini N, Bellocco R, Greenland S. Generalized least squares for trend estimation of summarized dose-response data. *Stata Journal*. 2006.
12. Marcos M, Belhassen-Garcia M, Sanchez- Puente A, Sampedro-Gomez J, Azibeiro R, Dorado-Diaz PI, et al. Development of a severity of disease score and classification model by machine learning for hospitalized COVID-19 patients. *medRxiv*. 2020 Jan 1;2020.07.13.20150177.
13. Berenguer J, Ryan P, Rodríguez-Baño J, Jarrín I, Carratalà J, Pachón J, et al. Characteristics and predictors of death among 4,035 consecutively hospitalized

- patients with COVID-19 in Spain. *Clin Microbiol Infect.* 2020 Aug 4;S1198-743X(20)30431-6.
14. Sardu C, D'Onofrio N, Balestrieri ML, Barbieri M, Rizzo MR, Messina V, et al. Outcomes in Patients With Hyperglycemia Affected by COVID-19: Can We Do More on Glycemic Control? *Diabetes Care.* 2020 Jul;43(7):1408–15.
  15. Coppelli A, Giannarelli R, Aragona M, Penno G, Falcone M, Tiseo G, et al. Hyperglycemia at Hospital Admission Is Associated With Severity of the Prognosis in Patients Hospitalized for COVID-19: The Pisa COVID-19 Study. *Diabetes Care.* 2020 Aug 10;dc201380.
  16. Fadini GP, Morieri ML, Boscaro F, Fioretto P, Maran A, Busetto L, et al. Newly-diagnosed diabetes and admission hyperglycemia predict COVID-19 severity by aggravating respiratory deterioration. *Diabetes Res Clin Pract.* 2020 Aug 15;168:108374.
  17. Long Q, Zhou C, Wang Y, Song B, Cheng X, Dong Q, et al. Admission biochemical test associated with the prognosis of COVID-19: a multi-centered retrospective cohort study. 2020;1–19.
  18. Li H, Tian S, Chen T, Cui Z, Shi N, Zhong X, et al. Newly diagnosed diabetes is associated with a higher risk of mortality than known diabetes in hospitalized patients with COVID-19. *Diabetes, Obes Metab.* 2020 May 29;n/a(n/a).
  19. Wang S, Ma P, Zhang S, Song S, Wang Z, Ma Y, et al. Fasting blood glucose at admission is an independent predictor for 28-day mortality in patients with COVID-19 without previous diagnosis of diabetes: a multi-centre retrospective study. *Diabetologia.* 2020 Jul 10;1–10.
  20. Zhang Y, Cui Y, Shen M, Zhang J, Liu B, Dai M, et al. Association of diabetes mellitus with disease severity and prognosis in COVID-19: A retrospective cohort study. *Diabetes Res Clin Pract.* 2020/05/22. 2020 Jul;165:108227.
  21. Zhu B, Jiang C, Feng X, Zheng Y, Yang J, Wang F, et al. Correlation between Fasting Blood Glucose Level at Admission and Mortality in COVID-19 Patients: A Retrospective Study. *Res Sq.* 2020;1–11.
  22. Jiang Q, Liu Q, Chen F, Zeng X, Song F, Lu Z, et al. Reporting quality and statistical analysis of published dose-response meta-analyses was suboptimal: a cross-sectional literature survey. *J Clin Epidemiol.* 2019;115(July):133–40.
  23. Crippa A, Orsini N. Dose-response meta-analysis of differences in means. *BMC Med Res Methodol.* 2016;16(1):91.

24. R Core Team. R: A language and environment for statistical computing. Vienna: R Foundation for Statistical Computing; 2020.
25. Balduzzi S, Rücker G, Schwarzer G. How to perform a meta-analysis with R: a practical tutorial. *Evid Based Ment Health*. 2019 Nov;22(4):153–60.
26. Crippa A, Orsini N. Multivariate dose-response meta-analysis: The dosresmeta R package. *J Stat Softw*. 2016;72(1):1–15.
27. Harrel Jr FE. rms: Regression Modeling Strategies. R package version 6.0-1 [Internet]. 2020 [cited 2020 Aug 30]. Available from: <https://cran.r-project.org/package=rms>
28. Bode B, Garrett V, Messler J, McFarland R, Crowe J, Booth R, et al. Glycemic Characteristics and Clinical Outcomes of COVID-19 Patients Hospitalized in the United States. *J Diabetes Sci Technol*. 2020 May 9;14(4):813–21.
29. Cai Y, Shi S, Yang F, Yi B, Chen X, Li J, et al. Fasting Glucose Level Is a Predictor of Mortality in Patients with COVID-19 Independent of Diabetes History. *SSRN Electron J*. 2020;
30. Cariou B, Hadjadj S, Wargny M, Pichelin M, Al-Salameh A, Allix I, et al. Phenotypic characteristics and prognosis of inpatients with COVID-19 and diabetes: the CORONADO study. *Diabetologia*. 2020/05/29. 2020 Aug;63(8):1500–15.
31. Chang MC, Hwang J-M, Jeon J-H, Kwak SG, Park D, Moon JS. Fasting Plasma Glucose Level Independently Predicts the Mortality of Patients with Coronavirus Disease 2019 Infection: A Multicenter, Retrospective Cohort Study. *J Korean Endocr Soc*. 2020 Aug 26;0.
32. Deng M, Qi Y, Deng L, Wang H, Xu Y, Li Z, et al. Obesity as a Potential Predictor of Disease Severity in Young COVID-19 Patients: A Retrospective Study. *Obesity*. 2020 Jun;0–3.
33. Gao S, Jiang F, Jin W, Shi Y, Yang L, Xia Y, et al. Risk factors influencing the prognosis of elderly patients infected with COVID-19: a clinical retrospective study in Wuhan, China. *Aging (Albany NY)*. 2020 Jan 1;12(13):12504–16.
34. Gupta R, Agrawal R, Bukhari Z, Jabbar A, Wang D, Diks J, et al. Higher Comorbidities and Early Death is Characteristic of Hospitalized African-American Patients with COVID-19. *medRxiv*. 2020 Jan 1;2020.07.15.20154906.
35. Han M, Ma K, Wang X, Yan W, Wang H, You J, et al. Higher fasting plasma glucose reduced the survival rate of 306 hospitalized patients with COVID-19 in Wuhan, China. *SSRN Electron J*. 2020;
36. Huang R, Zhu L, Xue L, Liu L, Yan X, Wang J, et al. Clinical findings of patients with



- coronavirus disease 2019 in Jiangsu province, China: A retrospective, multi-center study. *PLoS Negl Trop Dis*. 2020 May 8;14(5):e0008280–e0008280.
37. Iacobellis G, Penaherrera CA, Bermudez LE, Bernal Mizrachi E. Admission hyperglycemia and radiological findings of SARS-CoV2 in patients with and without diabetes. *Diabetes Res Clin Pract*. 2020/05/01. 2020 Jun;164:108185.
  38. Li Y, Han X, Alwalid O, Cui Y, Cao Y, Liu J, et al. Baseline characteristics and risk factors for short-term outcomes in 132 COVID-19 patients with diabetes in Wuhan China: A retrospective study. *Diabetes Res Clin Pract*. 2020 Aug 1;166.
  39. Liu S-P, Zhang Q, Wang W, Zhang M, Liu C, Xiao X, et al. Hyperglycemia is a strong predictor of poor prognosis in COVID-19. *Diabetes Res Clin Pract*. 2020 Jul 23;167:108338.
  40. Mejia-Vilet JM, Cordova-Sanchez BM, Fernandez-Camargo D, Mendez-Perez RA, Morales-Buenrostro LE, Hernandez-Gilsoul T. A Risk Score to Predict Admission to Intensive Care Unit in Patients With COVID-19: The ABC-GOALS Score. *medRxiv*. 2020 Jan 1;2020.05.12.20099416.
  41. Shi Q, Zhang X, Jiang F, Zhang X, Hu N, Bimu C, et al. Clinical Characteristics and Risk Factors for Mortality of COVID-19 Patients With Diabetes in Wuhan, China: A Two-Center, Retrospective Study. *Diabetes Care*. 2020 Jul;43(7):1382–91.
  42. Smith SM, Boppana A, Traupman JA, Unson E, Maddock DA, Chao K, et al. Impaired glucose metabolism in patients with diabetes, prediabetes, and obesity is associated with severe COVID-19. *J Med Virol*. 2020 Jun 26;10.1002/jmv.26227.
  43. Tu Y, Yang P, Zhou Y, Wen X, Li Q, Zhou J, et al. Factors Associated with Early Invasive Ventilation in Critically Ill Patients with COVID-19: A Single-Centered, Retrospective, Observational Study. *SSRN Electron J*. 2020;
  44. Wang F, Yang Y, Dong K, Yan Y, Zhang S, Ren H, et al. CLINICAL CHARACTERISTICS OF 28 PATIENTS WITH DIABETES AND COVID-19 IN WUHAN, CHINA. *Endocr Pract Off J Am Coll Endocrinol Am Assoc Clin Endocrinol*. 2020 Jun;26(6):668–74.
  45. Wu C, Chen X, Cai Y, Xia J, Zhou X, Xu S, et al. Risk Factors Associated With Acute Respiratory Distress Syndrome and Death in Patients With Coronavirus Disease 2019 Pneumonia in Wuhan, China. *JAMA Intern Med*. 2020 Mar 13;180(7):1–11.
  46. Wu J, Huang J, Zhu G, Wang Q, Lv Q, Huang Y, et al. Elevation of blood glucose level predicts worse outcomes in hospitalized patients with COVID-19: a retrospective cohort study. *BMJ open diabetes Res care*. 2020 Jun;8(1):e001476.

47. Yan Y, Yang Y, Wang F, Ren H, Zhang S, Shi X, et al. Clinical characteristics and outcomes of patients with severe covid-19 with diabetes. *BMJ Open Diabetes Res & Care*. 2020 Apr 1;8(1):e001343.
48. Yang J-K, Jin J-M, Liu S, Bai P, He W, Wu F, et al. Blood Glucose Is a Representative of the Clustered Indicators of Multi-Organ Injury for Predicting Mortality of COVID-19 in Wuhan, China. *SSRN Electron J*. 2020;
49. Zhang J, Kong W, Xia P, Xu Y, Li L, Li Q, et al. Impaired Fasting Glucose and Diabetes Are Related to Higher Risks of Complications and Mortality Among Patients With Coronavirus Disease 2019. *Front Endocrinol (Lausanne)*. 2020 Jul 10;11:525.
50. Zhang Q, Wei Y, Chen M, Wan Q, Chen X. Clinical analysis of risk factors for severe COVID-19 patients with type 2 diabetes. *J Diabetes Complications*. 2020 Jun 29;107666.
51. Zhang Y, Li H, Zhang J, Cao Y, Zhao X, Yu N, et al. The clinical characteristics and outcomes of patients with diabetes and secondary hyperglycaemia with coronavirus disease 2019: A single-centre, retrospective, observational study in Wuhan. *Diabetes Obes Metab*. 2020/06/17. 2020 Aug;22(8):1443–54.
52. Zhou J, Tse G, Lee S, Liu T, Wu WKK, Cao Z, et al. Identifying main and interaction effects of risk factors to predict intensive care admission in patients hospitalized with COVID-19: a retrospective cohort study in Hong Kong. *medRxiv*. 2020 Jan 1;2020.06.30.20143651.
53. Zhu B, Jin S, Wu L, Hu C, Wang Z, Bu L, et al. J-shaped Association Between Fasting Blood Glucose Levels and COVID-19 Severity in Patients without Diabetes. *Diabetes Res Clin Pract*. 2020 Aug 24;108381.
54. Huguet A, Hayden JA, Stinson J, McGrath PJ, Chambers CT, Tougas ME, et al. Judging the quality of evidence in reviews of prognostic factor research: adapting the GRADE framework. *Syst Rev*. 2013 Sep 5;2:71.
55. Schünemann H, Brożek J, Guyatt G, Oxman A, editors. GRADE handbook for grading quality of evidence and strength of recommendations. Updated October 2013. The GRADE Working Group; 2013.
